# Supplementary material for: Photochemically generated reactive sites at ruthenium/gallium complexes: catalysis vs. cluster growth
Source: Royal Society of Chemistry journal article supplement (doi:10.1039/d3dt01847d), 2023-01-01
Supplement: d3dt01847d1.pdf [file d3dt01847d1.pdf]

## Supporting Information

# Photochemically Generated Reactive Sites at Ruthenium/Gallium Complexes: Catalysis vs. Cluster Growth.

Raphael Bühler<sup># a</sup>, Maximilian Muhr<sup># a</sup>, Johannes Stephan<sup>a</sup>, Robert Wolf<sup>a</sup>, Max Schütz<sup>a</sup>,  
Christian Gemel<sup>a</sup>, Roland A. Fischer<sup>\*a</sup>

a) Chair of Inorganic and Metalorganic Chemistry, Department of Chemistry, TUM School of Natural Sciences, Technical University Munich, Lichtenbergstraße 4, D-85748 Garching, Germany and Catalysis Research Center, Ernst-Otto-Fischer-Straße 1, D-85748 Garching, Germany.

Email: [roland.fischer@tum.de](mailto:roland.fischer@tum.de)

<sup>#</sup>M.M. and R.B. equally contributed to this work

## Table of Contents

|                                    |    |
|------------------------------------|----|
| <b>Crystallographic Data</b> ..... | 3  |
| <b>NMR spectra</b> .....           | 7  |
| <b>LIFDI mass spectra</b> .....    | 21 |
| <b>IR spectra</b> .....            | 30 |
| <b>UV-Vis spectra</b> .....        | 31 |

## Crystallographic Data

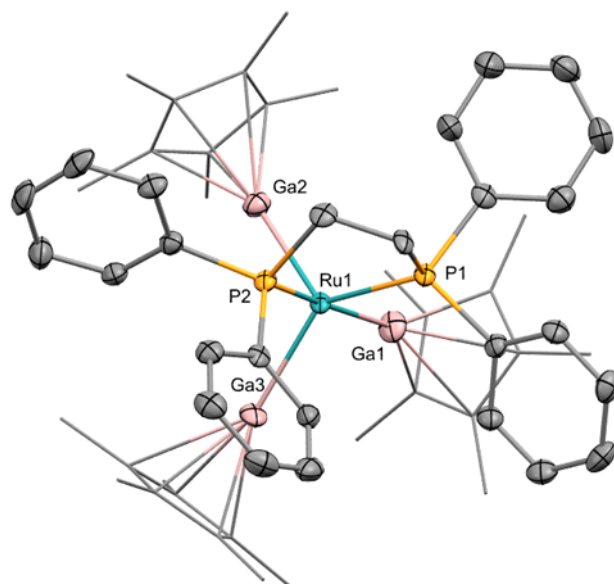

Figure S1: Crystal structure of  $[(dppe)Ru(GaCp^*)_3]$ . Co-crystallized molecule *n*-hexane and hydrogen atoms omitted for clarity. Ellipsoids drawn at 50% probability. Cp\* in wireframes.

Table S1: Crystallographic data table for compound 4.

|                        |                             |                           |
|------------------------|-----------------------------|---------------------------|
| Chemical formula       | $C_{62}H_{83}Ga_3P_2Ru$     |                           |
| Formula weight         | 1200.45                     |                           |
| Temperature            | 100(2) K                    |                           |
| Wavelength             | 0.71073 Å                   |                           |
| Crystal size           | 0.059 x 0.066 x 0.225 mm    |                           |
| Crystal habit          | red-orange fragment         |                           |
| Crystal system         | monoclinic                  |                           |
| Space group            | P 1 21/n 1                  |                           |
| Unit cell dimensions   | $a = 19.841(3)$ Å           | $\alpha = 90^\circ$       |
|                        | $b = 12.724(2)$ Å           | $\beta = 99.625(7)^\circ$ |
|                        | $c = 22.940(4)$ Å           | $\gamma = 90^\circ$       |
| Volume                 | $5709.8(16)$ Å <sup>3</sup> |                           |
| Z                      | 4                           |                           |
| Density (calculated)   | 1.397 g/cm <sup>3</sup>     |                           |
| Absorption coefficient | 1.753 mm <sup>-1</sup>      |                           |
| F(000)                 | 2488                        |                           |
| Diffractometer         | Bruker D8 Venture           |                           |

---

|                                     |                                                                                                                          |              |
|-------------------------------------|--------------------------------------------------------------------------------------------------------------------------|--------------|
| Radiation source                    | TXS rotating anode, Mo                                                                                                   |              |
| Theta range for data collection     | 2.41 to 25.68°                                                                                                           |              |
| Index ranges                        | -24<=h<=24, -15<=k<=15, -27<=l<=27                                                                                       |              |
| Reflections collected               | 226471                                                                                                                   |              |
| Independent reflections             | 10838 [R(int) = 0.1954]                                                                                                  |              |
| Coverage of independent reflections | 99.9%                                                                                                                    |              |
| Absorption correction               | Multi-Scan                                                                                                               |              |
| Structure solution technique        | direct methods                                                                                                           |              |
| Structure solution program          | SHELXT 2014/5 (Sheldrick, 2014)                                                                                          |              |
| Refinement method                   | Full-matrix least-squares on F <sup>2</sup>                                                                              |              |
| Refinement program                  | SHELXL-2018/3 (Sheldrick, 2018)                                                                                          |              |
| Function minimized                  | $\Sigma w(F_o^2 - F_c^2)^2$                                                                                              |              |
| Data / restraints / parameters      | 10838 / 0 / 630                                                                                                          |              |
| Goodness-of-fit on F <sup>2</sup>   | 1.021                                                                                                                    |              |
| $\Delta/\sigma_{\max}$              | 0.001                                                                                                                    |              |
| Final R indices                     | 6979 data; I>2 $\sigma$ (I)                                                                                              | R1 = 0.0496, |
|                                     | all data                                                                                                                 | wR2 = 0.0861 |
|                                     |                                                                                                                          | R1 = 0.1073, |
|                                     |                                                                                                                          | wR2 = 0.1037 |
| Weighting scheme                    | w=1/[ $\sigma^2(F_o^2)+(0.0318P)^2+16.8706P$ ]<br>where P=(F <sub>o</sub> <sup>2</sup> +2F <sub>c</sub> <sup>2</sup> )/3 |              |
| Largest diff. peak and hole         | 0.982 and -0.774 eÅ <sup>-3</sup>                                                                                        |              |
| R.M.S. deviation from mean          | 0.114 eÅ <sup>-3</sup>                                                                                                   |              |

---

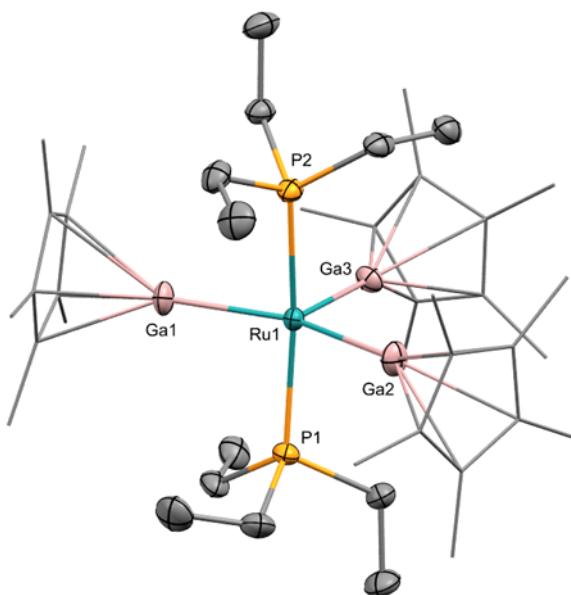

Figure S2: Crystal structure of  $[(Et_3P)_2Ru(GaCp^*)_3]$ . Co-crystallized molecule *n*-hexane and hydrogen atoms omitted for clarity. Ellipsoids drawn at 50% probability. Cp\* in wireframes.

Table S2: Crystallographic data table for compound  $[Ru(GaCp^*)_3(PEt_3)_2]$ .

|                        |                            |                     |
|------------------------|----------------------------|---------------------|
| Chemical formula       | $C_{48}H_{88.07}Ga_3P_2Ru$ |                     |
| Formula weight         | 1037.42                    |                     |
| Temperature            | 123(2) K                   |                     |
| Wavelength             | 0.71073 Å                  |                     |
| Crystal size           | 0.238 x 0.321 x 0.374 mm   |                     |
| Crystal habit          | orange block               |                     |
| Crystal system         | orthorhombic               |                     |
| Space group            | P 21 21 21                 |                     |
| Unit cell dimensions   | $a = 12.268(4)$ Å          | $\alpha = 90^\circ$ |
|                        | $b = 19.291(7)$ Å          | $\beta = 90^\circ$  |
|                        | $c = 21.580(6)$ Å          | $\gamma = 90^\circ$ |
| Volume                 | 5107.(3) Å <sup>3</sup>    |                     |
| Z                      | 4                          |                     |
| Density (calculated)   | 1.349 g/cm <sup>3</sup>    |                     |
| Absorption coefficient | 1.948 mm <sup>-1</sup>     |                     |
| F(000)                 | 2172                       |                     |
| Diffractionmeter       | Bruker D8 Venture          |                     |
| Radiation source       | TXS rotating anode, Mo     |                     |

---

|                                     |                                                                                                                         |              |
|-------------------------------------|-------------------------------------------------------------------------------------------------------------------------|--------------|
| Theta range for data collection     | 2.51 to 25.90°                                                                                                          |              |
| Index ranges                        | -14<=h<=15, -23<=k<=23, -26<=l<=26                                                                                      |              |
| Reflections collected               | 137547                                                                                                                  |              |
| Independent reflections             | 9855 [R(int) = 0.0279]                                                                                                  |              |
| Coverage of independent reflections | 99.3%                                                                                                                   |              |
| Absorption correction               | Multi-Scan                                                                                                              |              |
| Structure solution technique        | direct methods                                                                                                          |              |
| Structure solution program          | SHELXT 2014/5 (Sheldrick, 2014)                                                                                         |              |
| Refinement method                   | Full-matrix least-squares on F <sup>2</sup>                                                                             |              |
| Refinement program                  | SHELXL-2019/1 (Sheldrick, 2019)                                                                                         |              |
| Function minimized                  | $\Sigma w(F_o^2 - F_c^2)^2$                                                                                             |              |
| Data / restraints / parameters      | 9855 / 101 / 531                                                                                                        |              |
| Goodness-of-fit on F <sup>2</sup>   | 1.051                                                                                                                   |              |
| $\Delta/\sigma_{\max}$              | 0.003                                                                                                                   |              |
| Final R indices                     | 9563 data; I>2 $\sigma$ (I)                                                                                             | R1 = 0.0172, |
|                                     | all data                                                                                                                | wR2 = 0.0451 |
|                                     |                                                                                                                         | R1 = 0.0183, |
|                                     |                                                                                                                         | wR2 = 0.0455 |
| Weighting scheme                    | w=1/[ $\sigma^2(F_o^2)+(0.0257P)^2+1.6529P$ ]<br>where P=(F <sub>o</sub> <sup>2</sup> +2F <sub>c</sub> <sup>2</sup> )/3 |              |
| Largest diff. peak and hole         | 0.485 and -0.396 eÅ <sup>-3</sup>                                                                                       |              |
| R.M.S. deviation from mean          | 0.049 eÅ <sup>-3</sup>                                                                                                  |              |

---

## NMR spectra

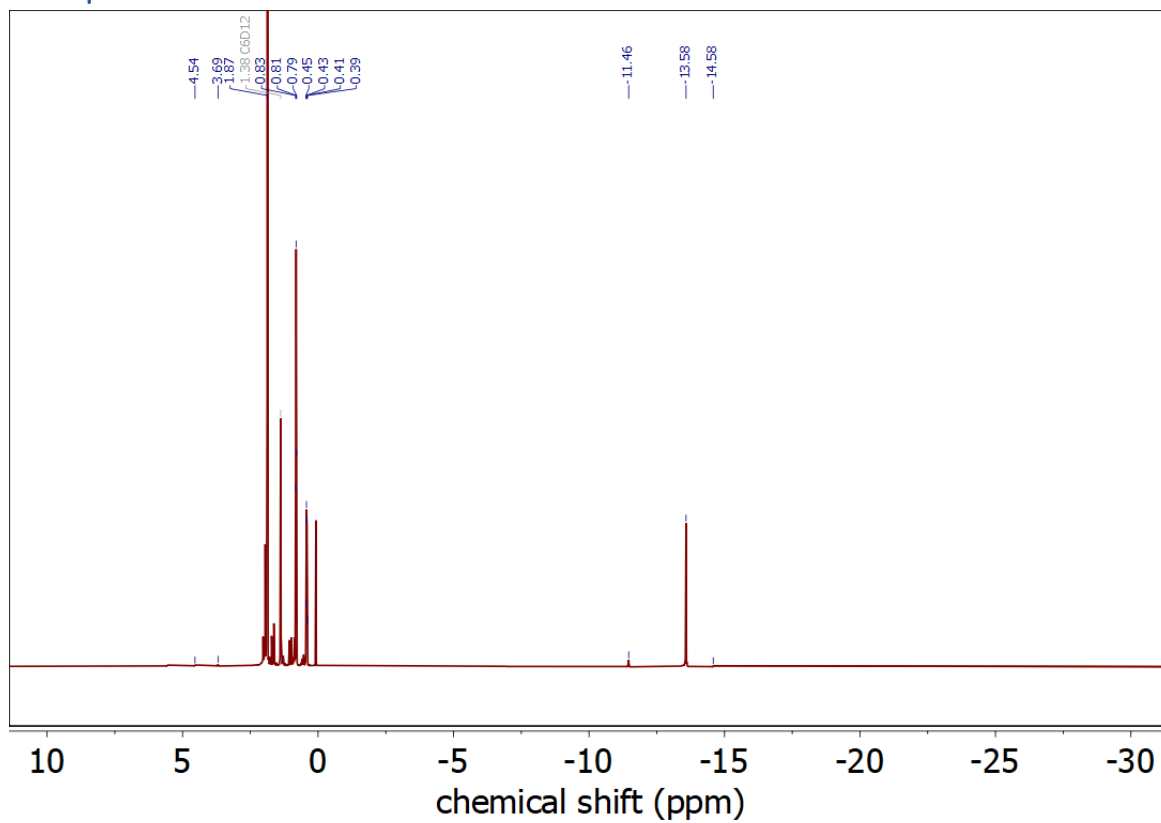

Figure S3:  $^1\text{H}$  NMR spectrum of **1** after 30 min irradiation at 350 nm in  $\text{C}_6\text{D}_{12}$ .

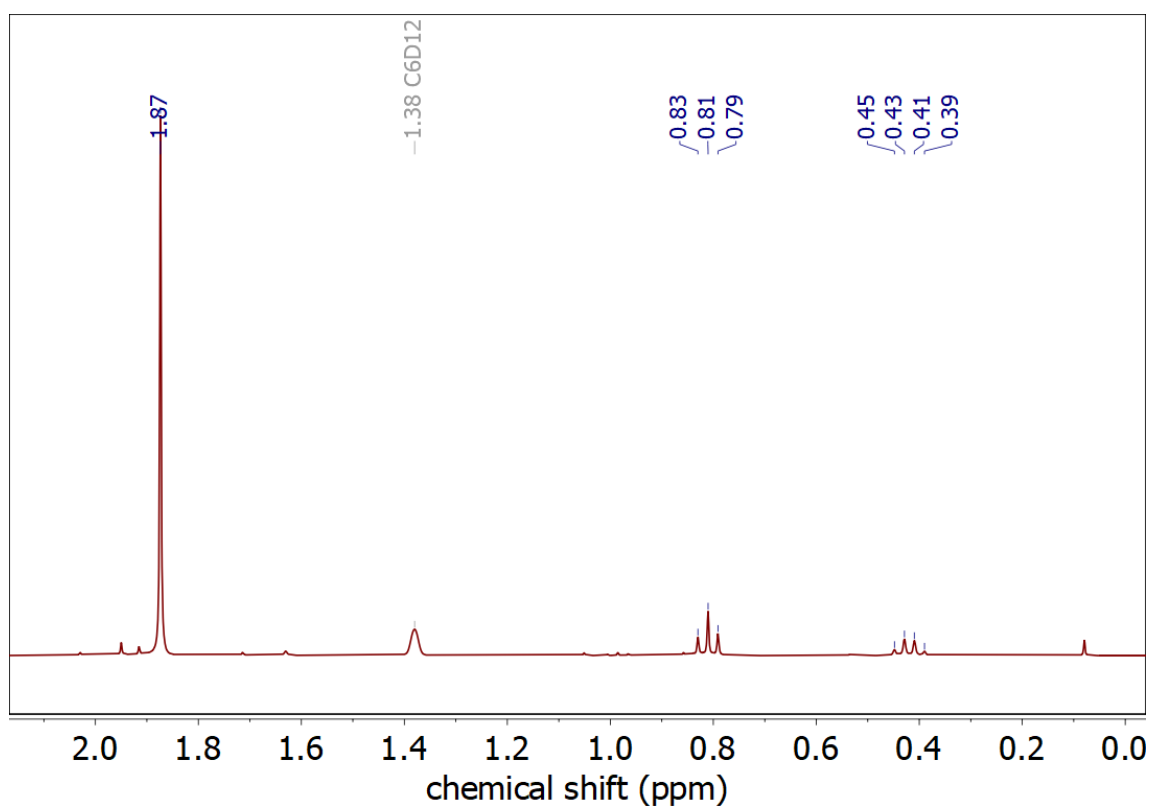

Figure S4:  $^1\text{H}$  NMR spectrum of **1** after 30 min irradiation at 350 nm in  $\text{C}_6\text{D}_{12}$ . Excerpt of the aliphatic range.

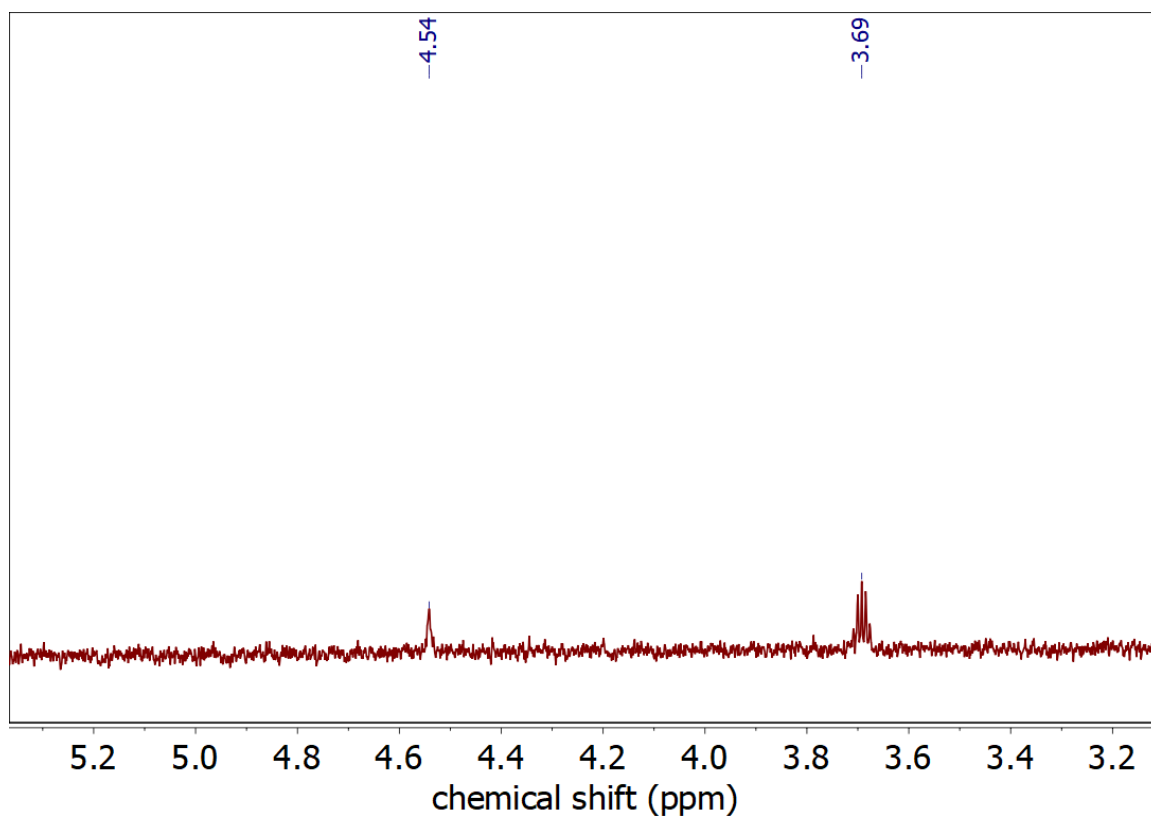

Figure S5:  $^1\text{H}$  NMR spectrum of **1** after 30 min irradiation at 350 nm in  $\text{C}_6\text{D}_{12}$ . Excerpt showing free hydrogen (4.54 ppm) and free triethylsilane (3.69 ppm, H-Si).

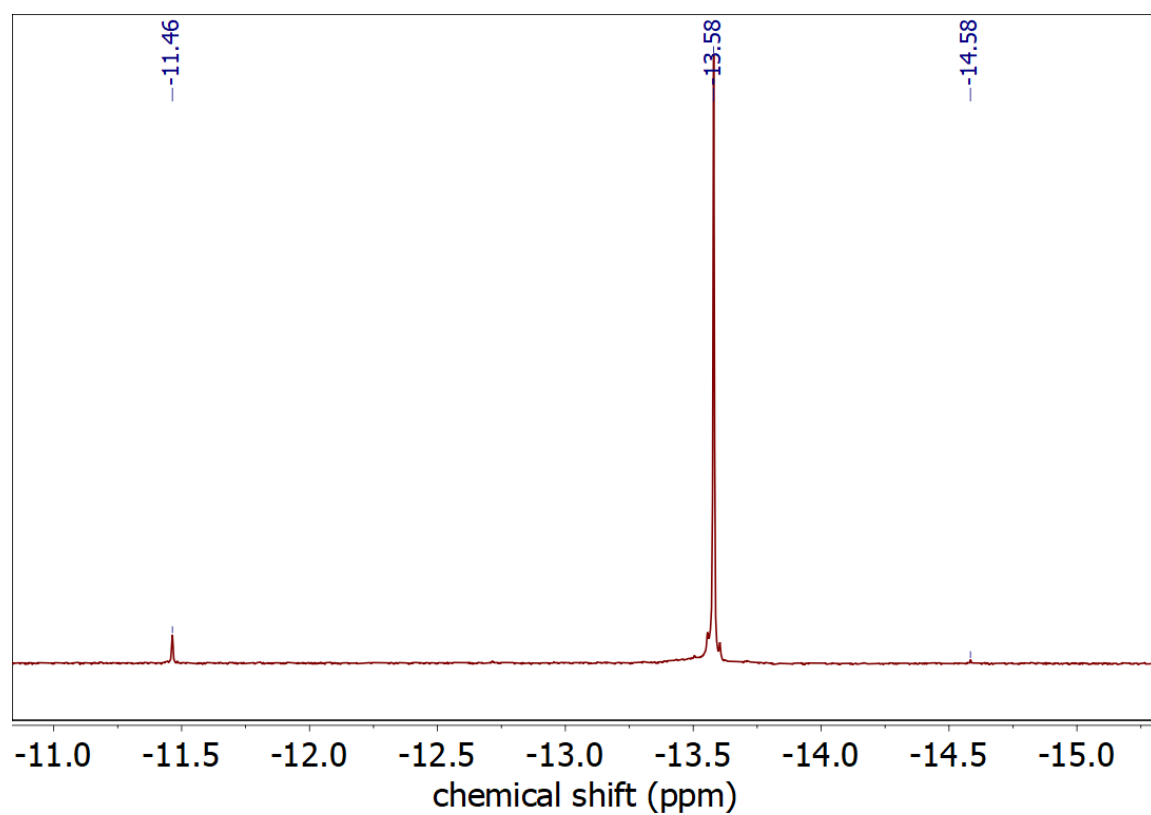

Figure S6:  $^1\text{H}$  NMR spectrum of **1** after 30 min irradiation at 350 nm in  $\text{C}_6\text{D}_{12}$ . Excerpt of the hydridic range, showing two new signals at -11.46 and -14.58 ppm.



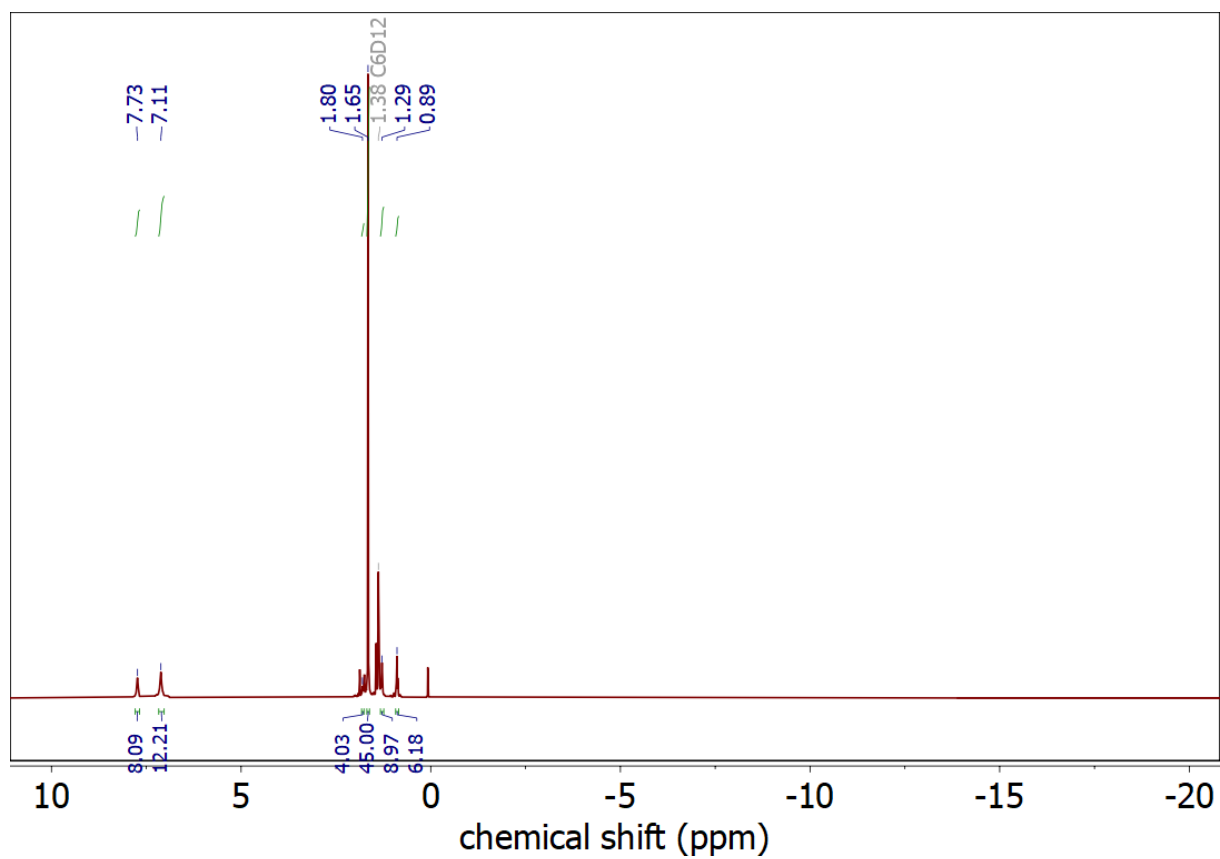

Figure S7: Full range  $^1\text{H}$  NMR of **4** in  $\text{C}_6\text{D}_{12}$ . No new hydride signals.

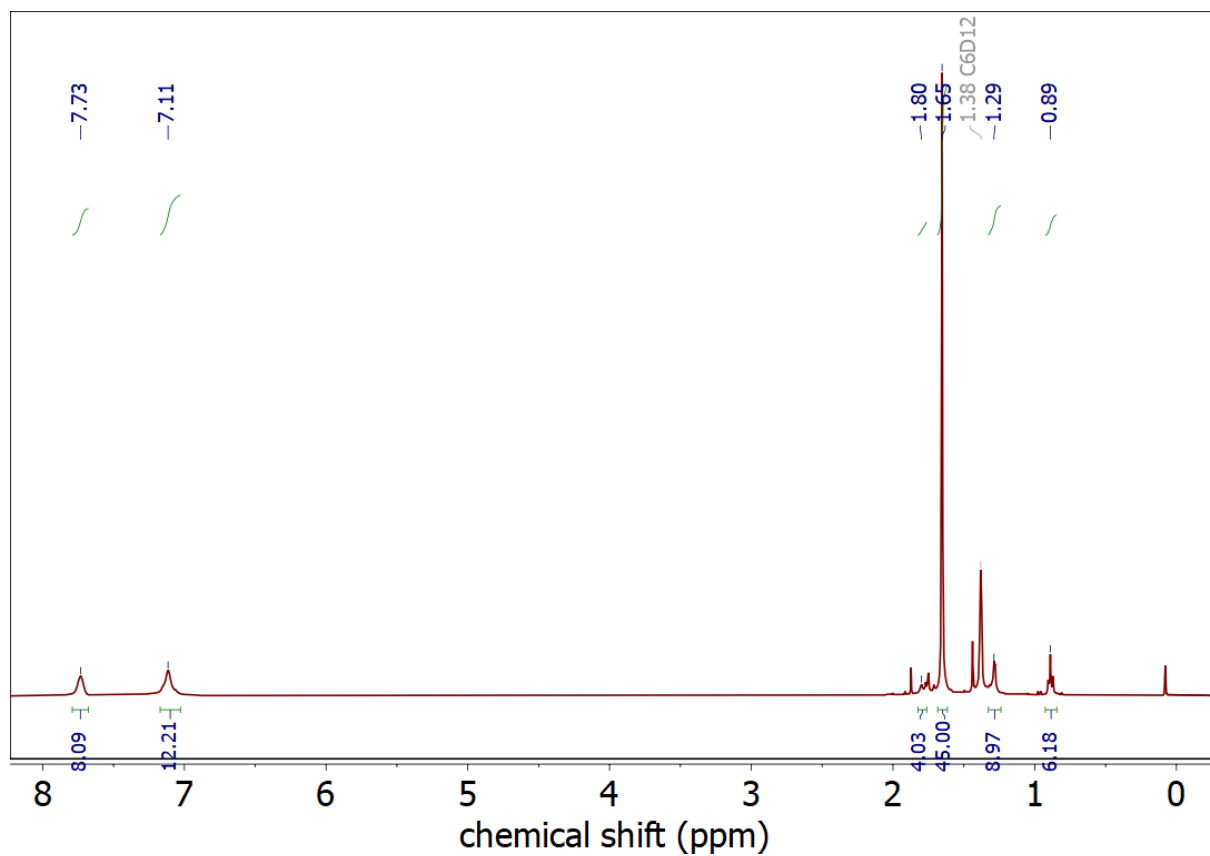

Figure S8: Zoomed into  $^1\text{H}$  NMR of **4** in  $\text{C}_6\text{D}_{12}$ .

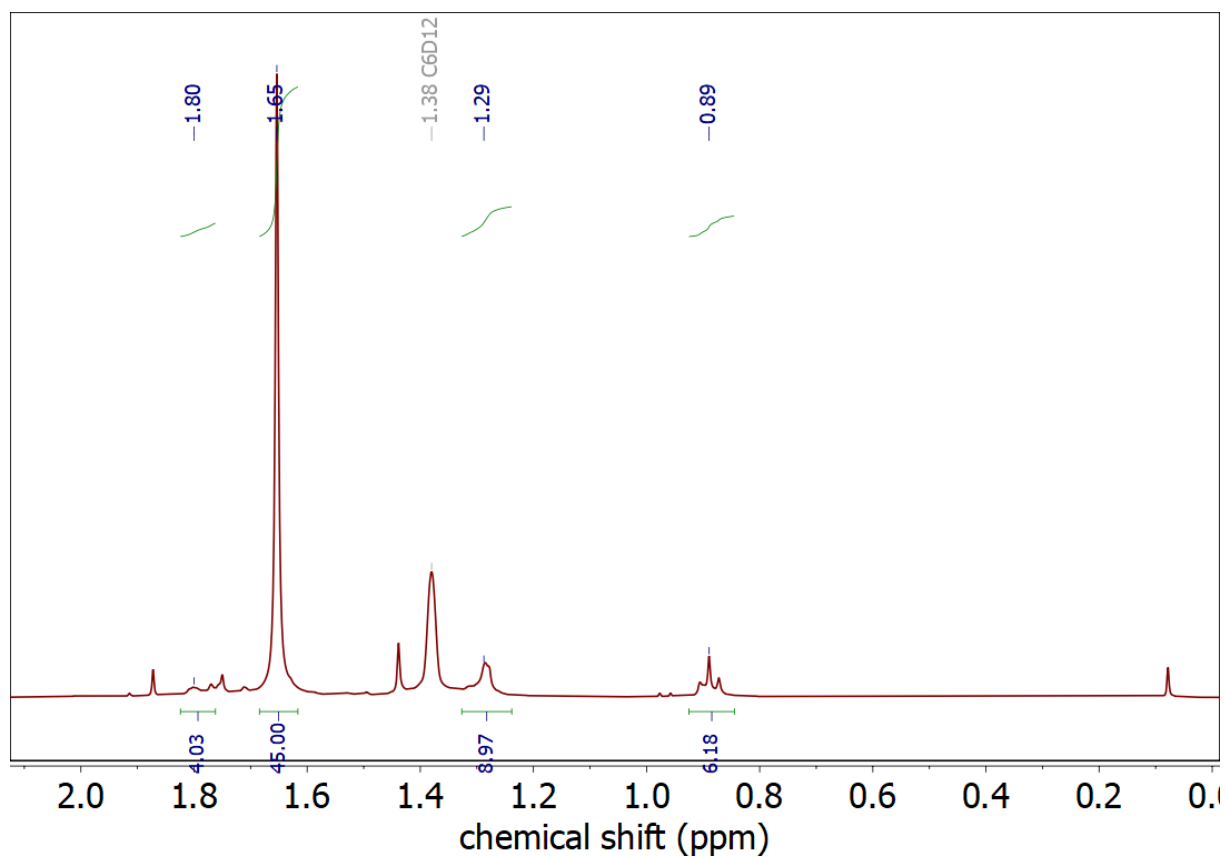

Figure S9: Zoomed into  $^1\text{H}$  NMR of **4** in  $\text{C}_6\text{D}_{12}$  – aliphatic range.

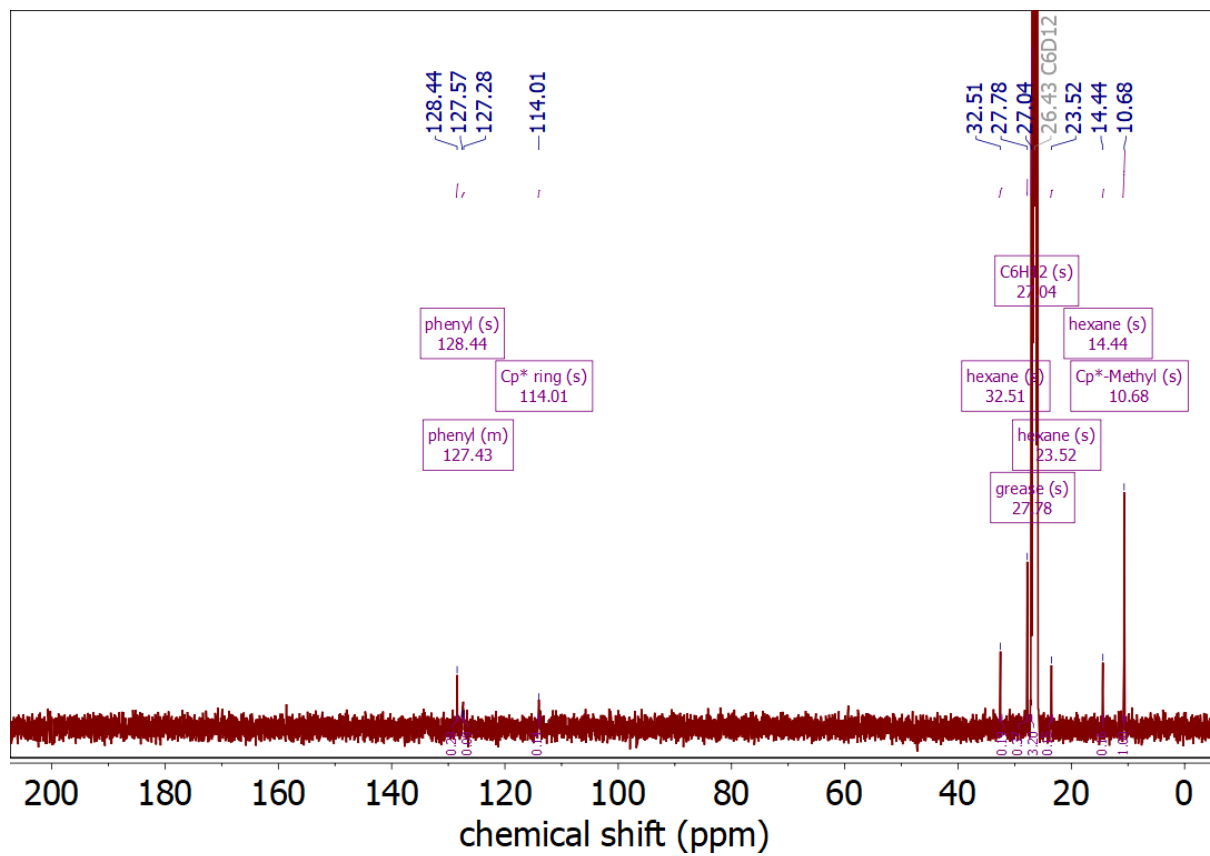

Figure 10: SFull range  $^{13}\text{C}$  NMR of **4** in  $\text{C}_6\text{D}_{12}$ .

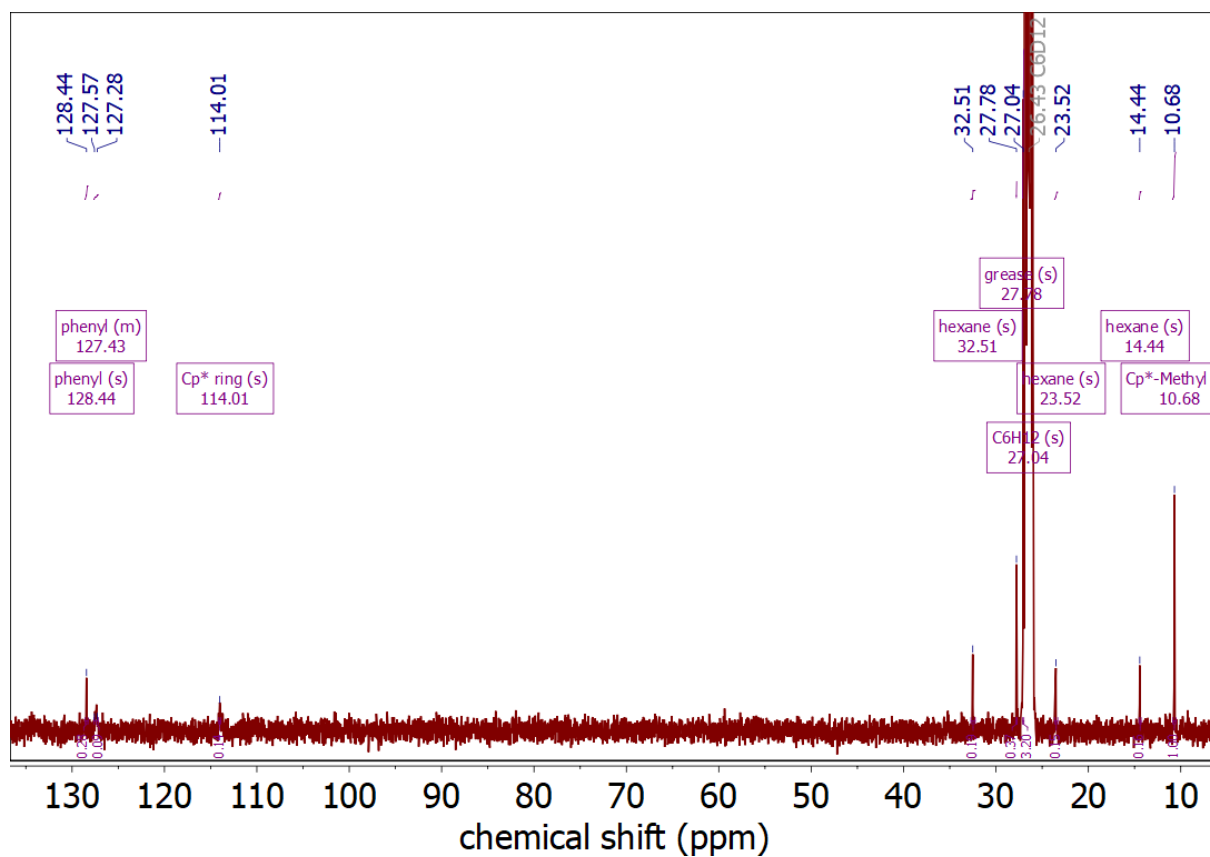

Figure S11: Zoomed into  $^{13}\text{C}$  NMR of **4** in  $\text{C}_6\text{D}_{12}$ .

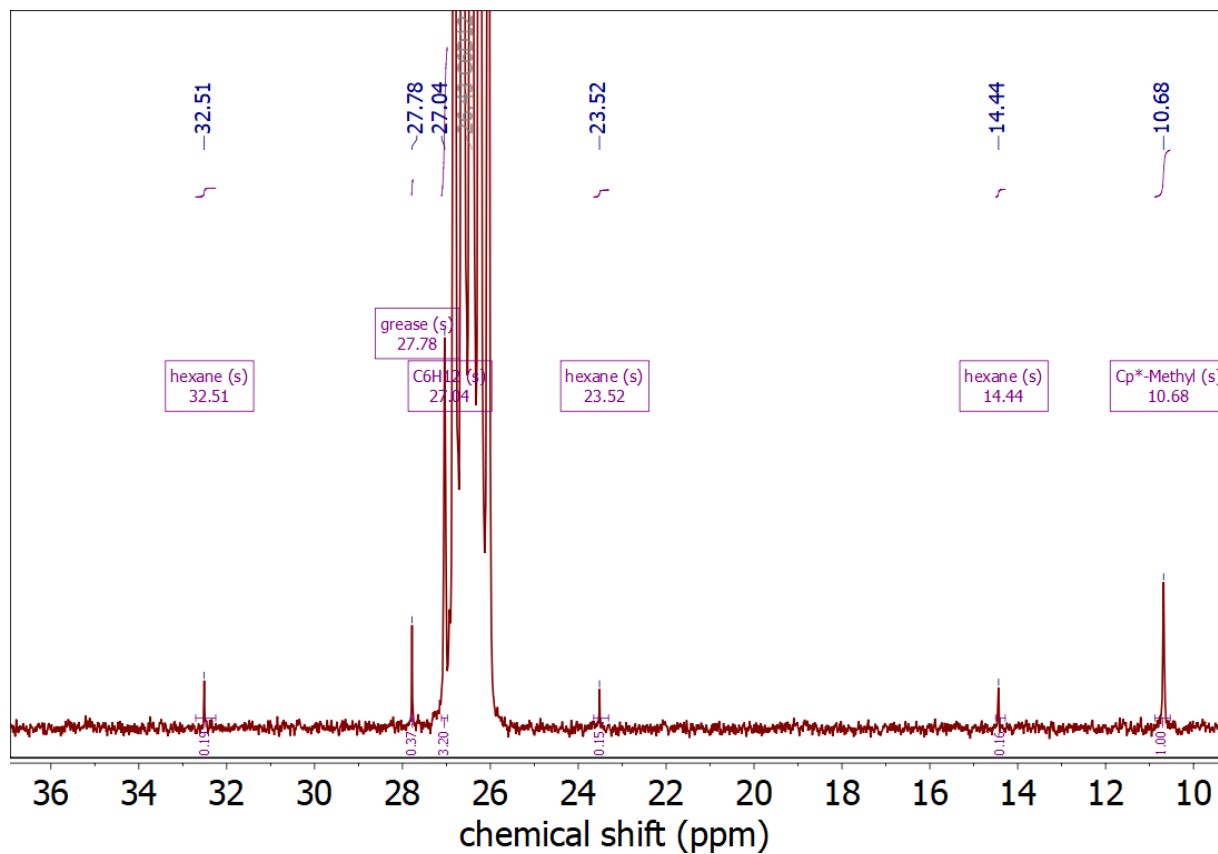

Figure S12:  $^{13}\text{C}$  NMR of **4** in  $\text{C}_6\text{D}_{12}$  – aliphatic range.

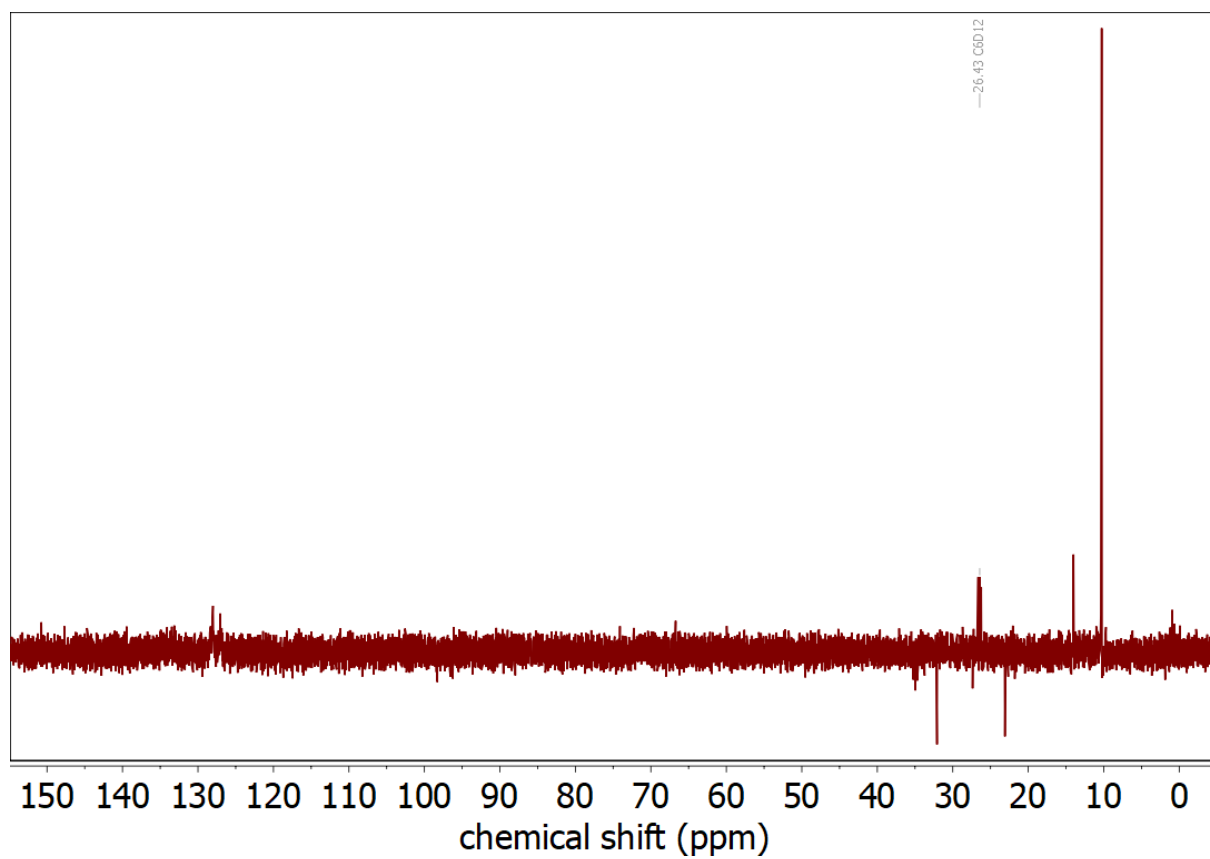

Figure S13: Full range DEPT 135 of **4** in C<sub>6</sub>D<sub>12</sub>.

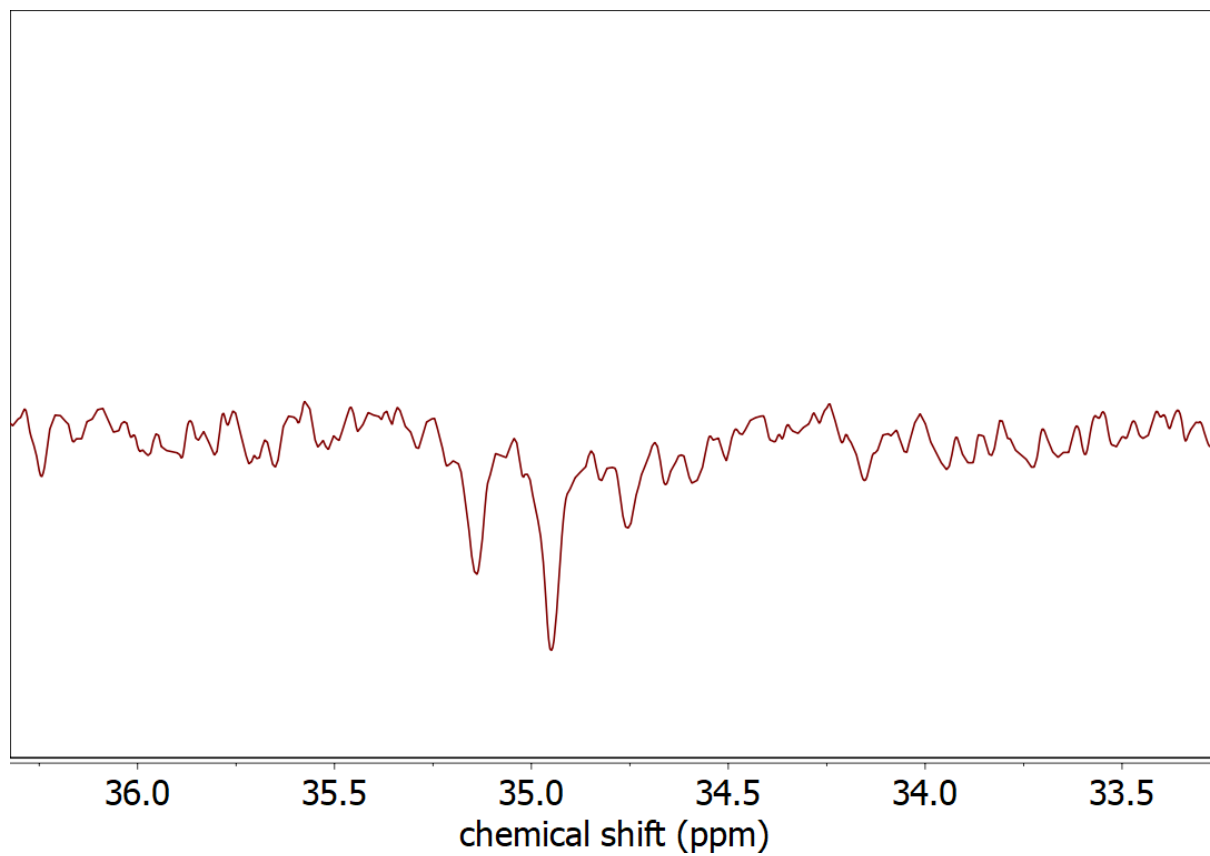

Figure S14: Zoomed into DEPT 135 of **4** in C<sub>6</sub>D<sub>12</sub>. Negative <sup>13</sup>C triplet (due to <sup>31</sup>P coupling) of dppe H<sub>2</sub>C-CH<sub>2</sub> bridge.

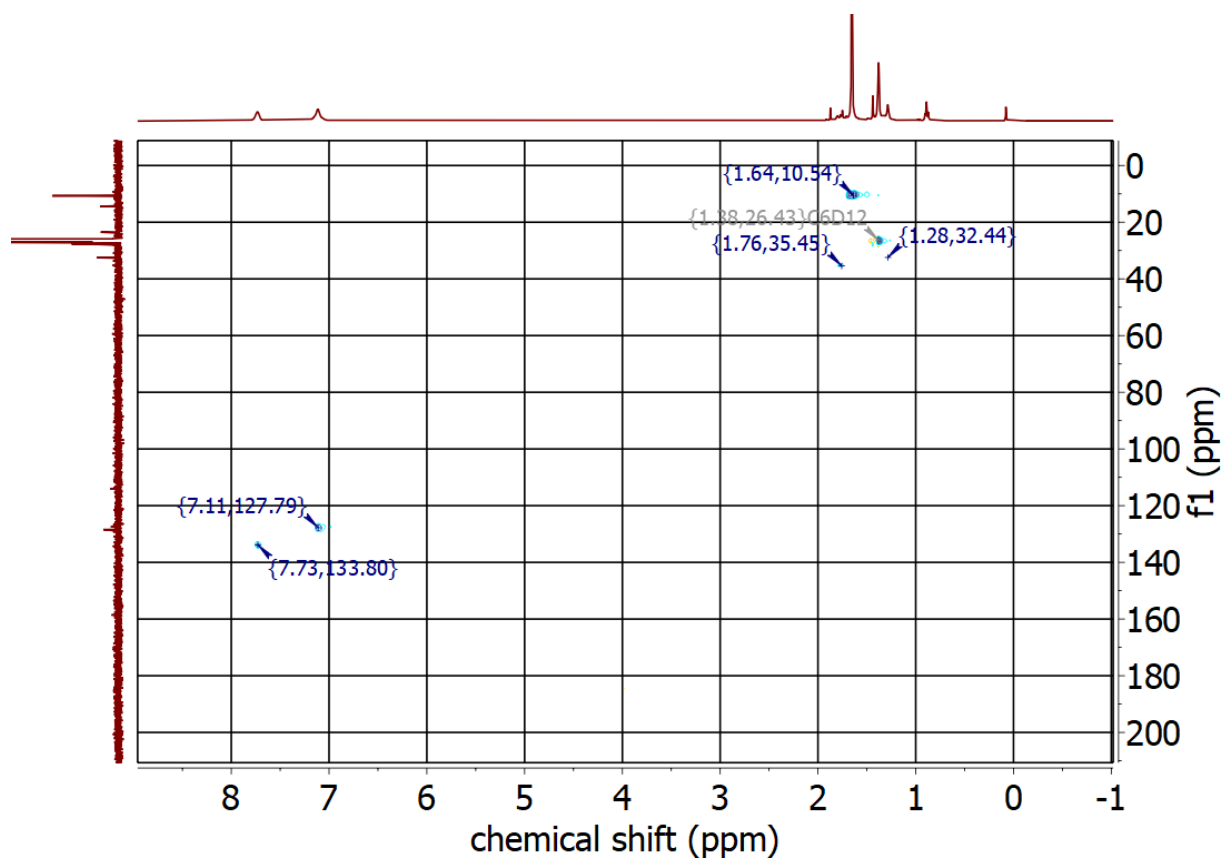

Figure S15: Full range HSQC spectrum of 4 in  $C_6D_{12}$ .

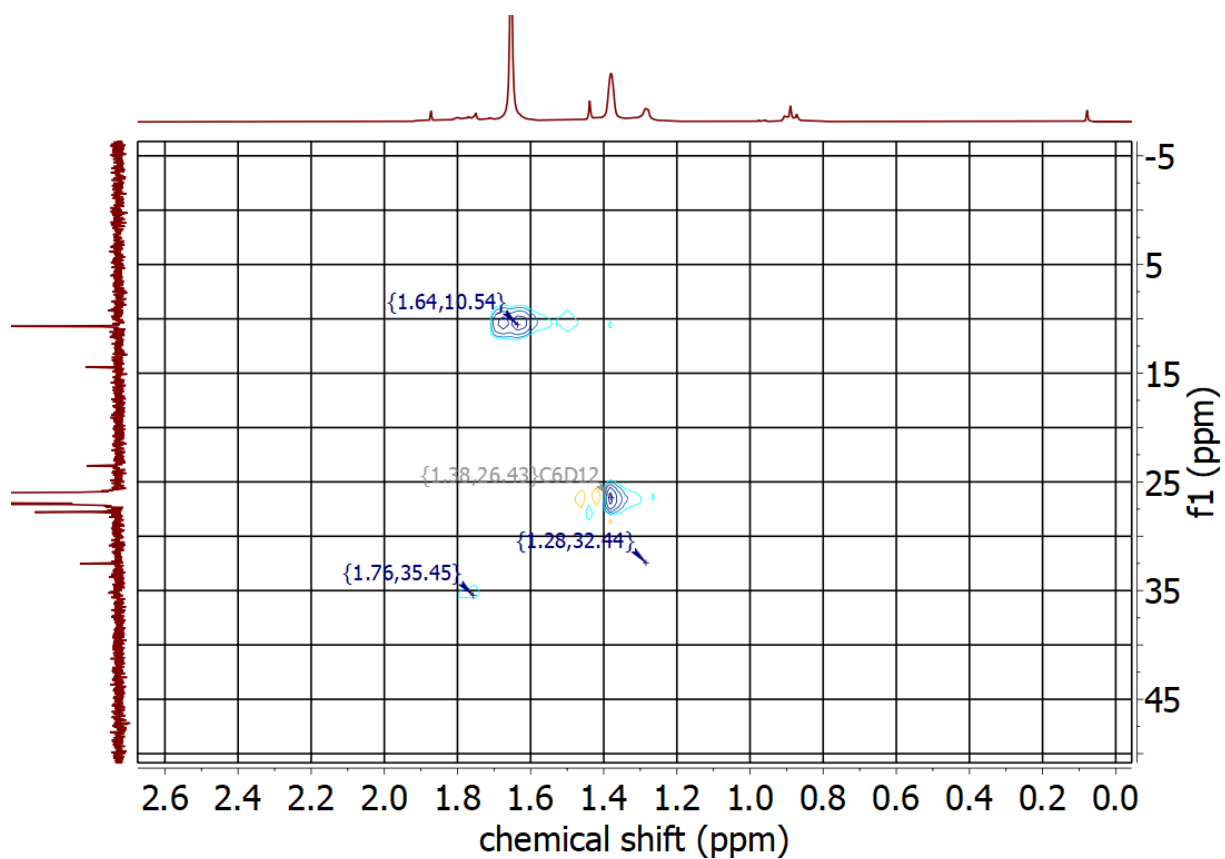

Figure S16: HSQC spectrum of 4 in  $C_6D_{12}$  – aliphatic range.

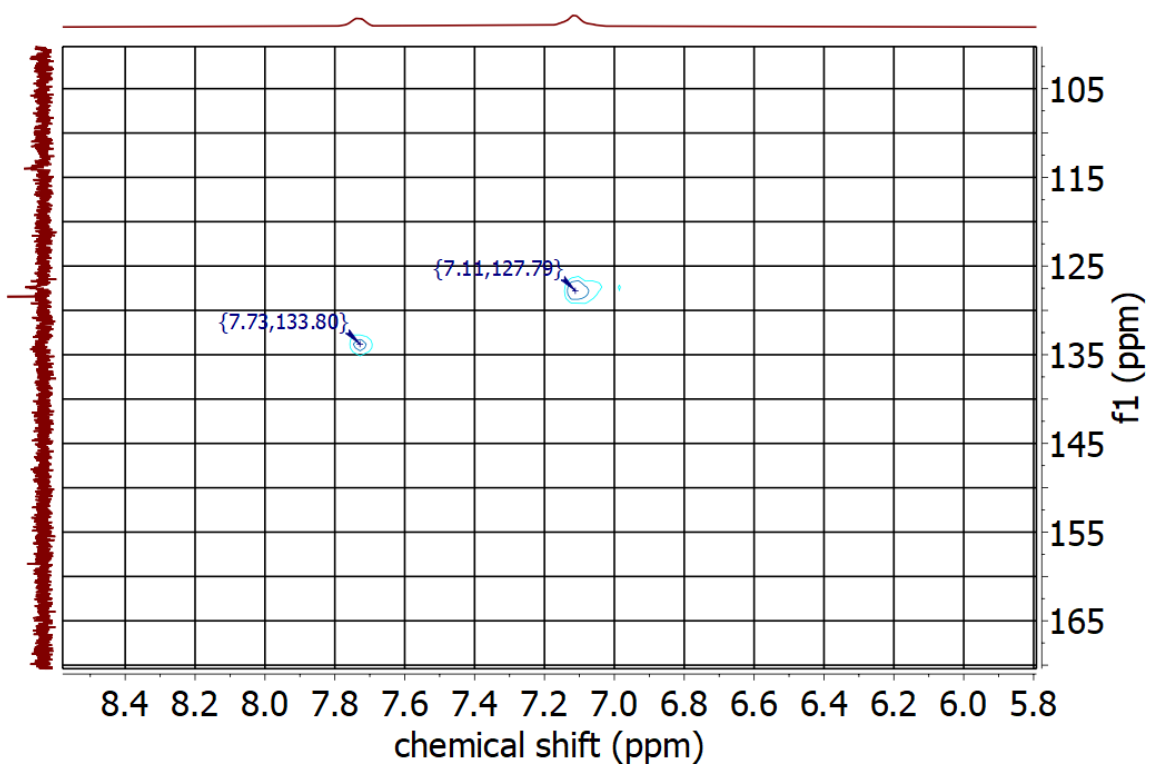

Figure S17: HSQC spectrum of **4** in  $C_6D_{12}$  – aromatic range.

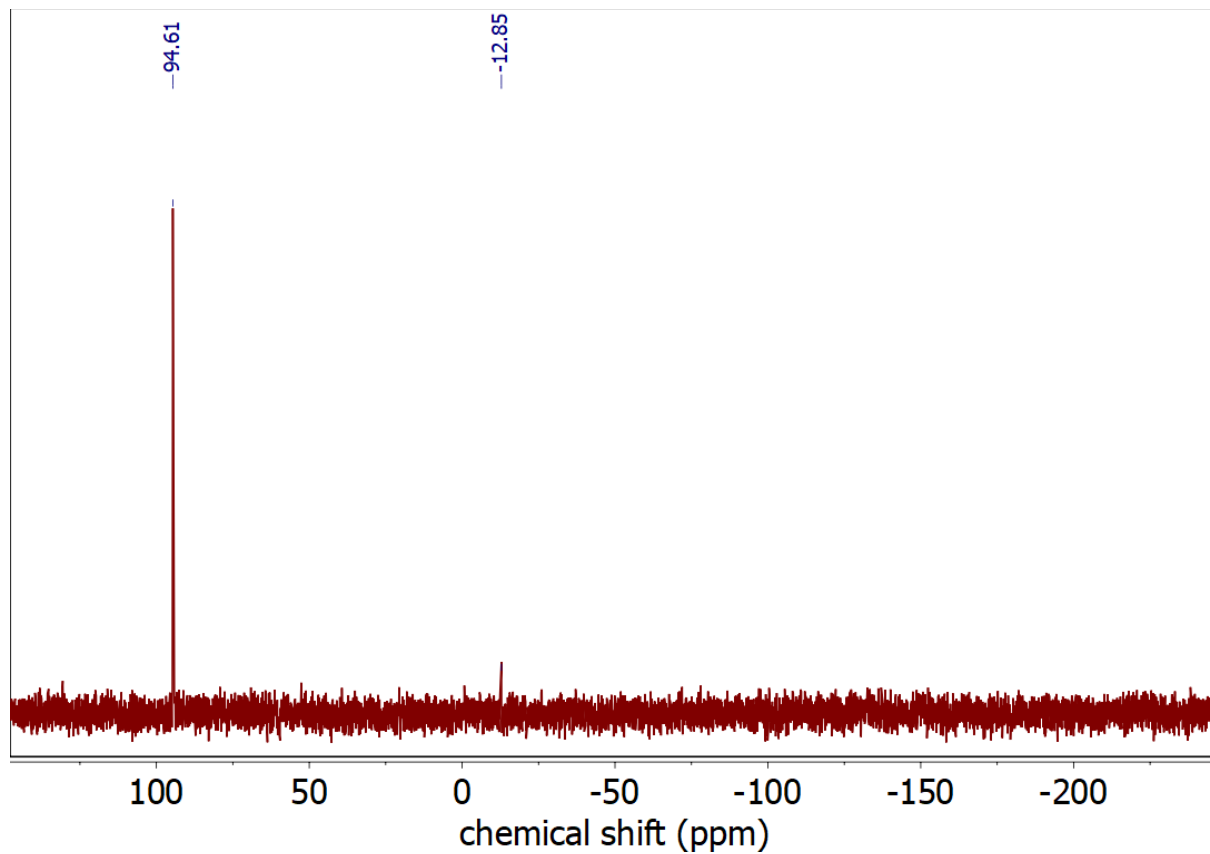

Figure S18: Full range  $^{31}P$  spectrum of **4** in  $C_6D_{12}$ .

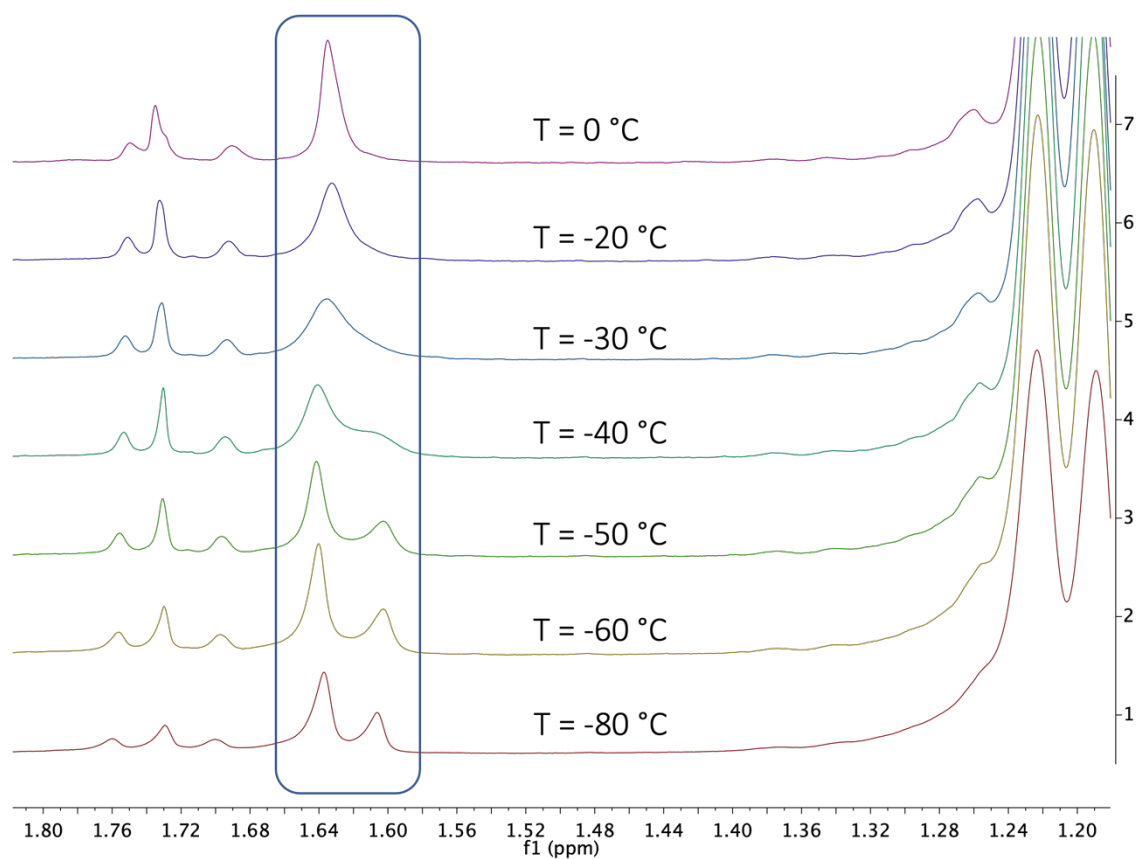

Figure S19: Variable Temperature  $^1\text{H-NMR}$  spectra of **4** between  $-80$  and  $0\text{ }^\circ\text{C}$  in  $n\text{-hexane-}d_{14}$ .

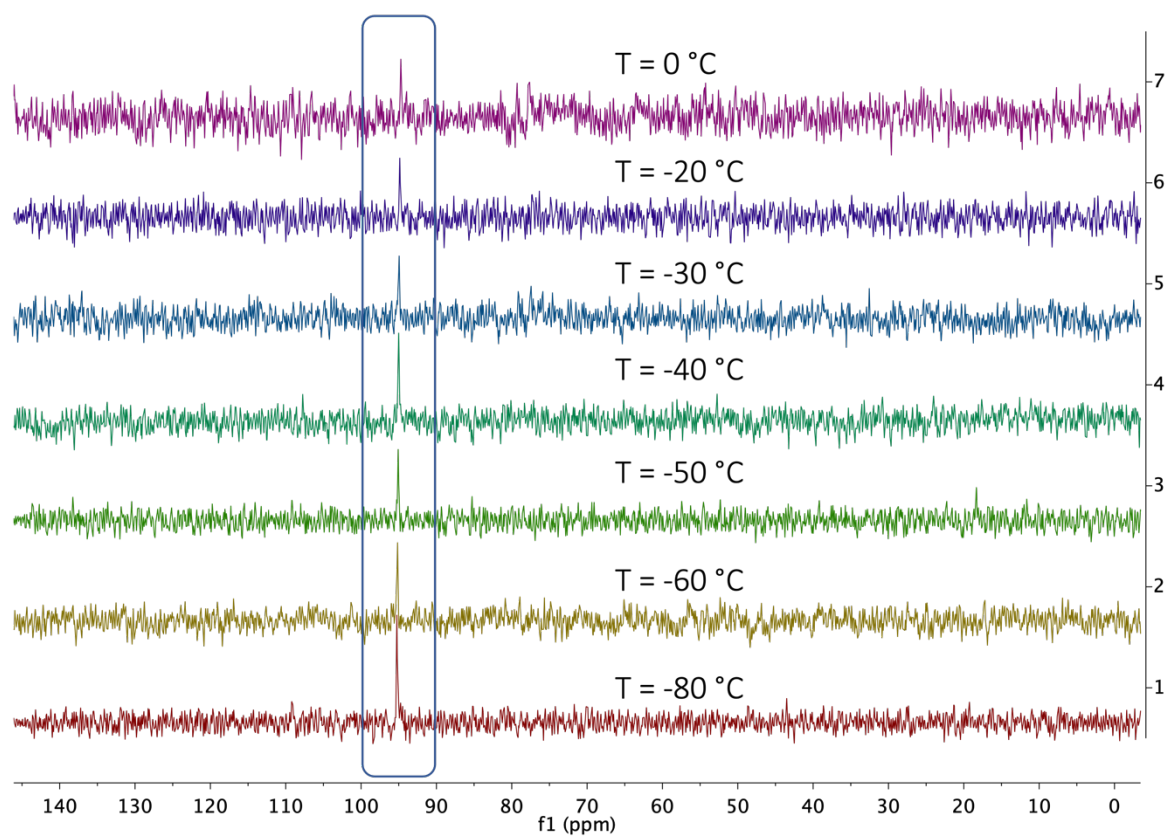

Figure S20: Variable Temperature  $^{31}\text{P-NMR}$  spectra of **4** between  $-80$  and  $0\text{ }^\circ\text{C}$  in  $n\text{-hexane-}d_{14}$ .

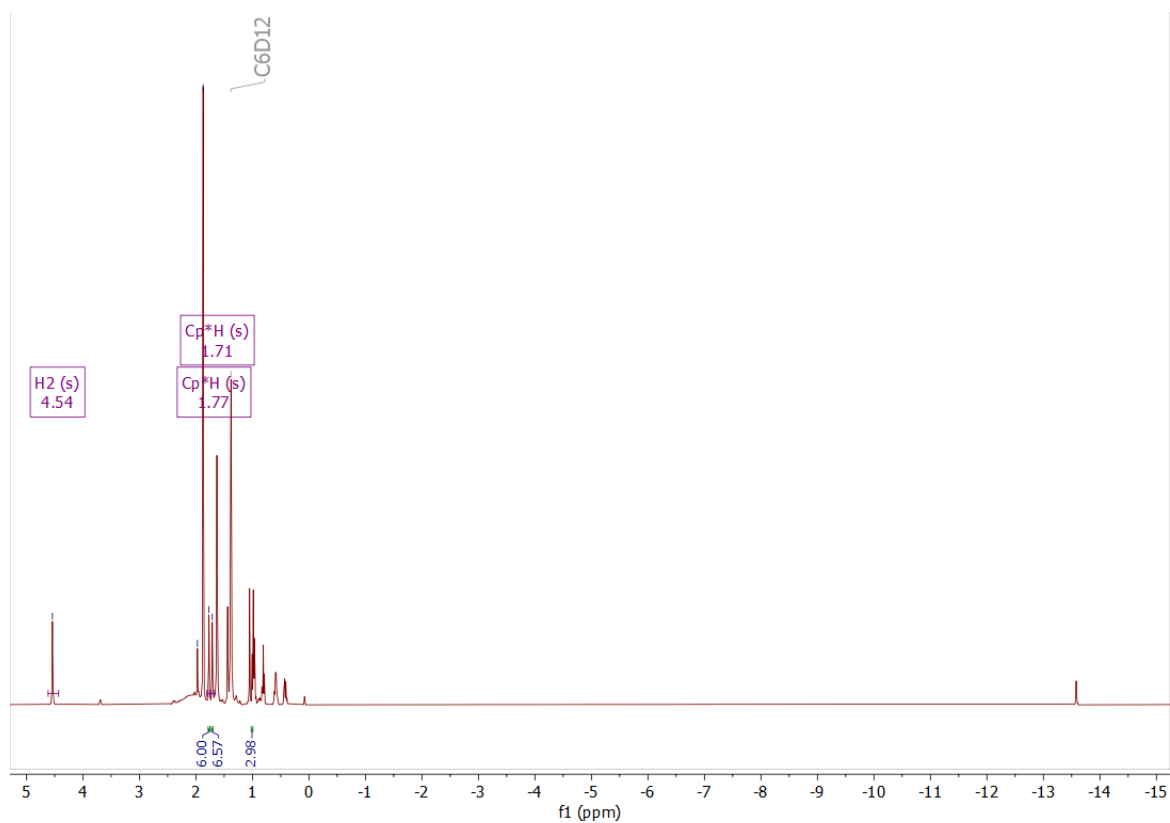

Figure S21:  $^1\text{H}$  NMR spectrum of the reaction of **1** with  $\text{H}_2$  under 1 h irradiation (350 nm).

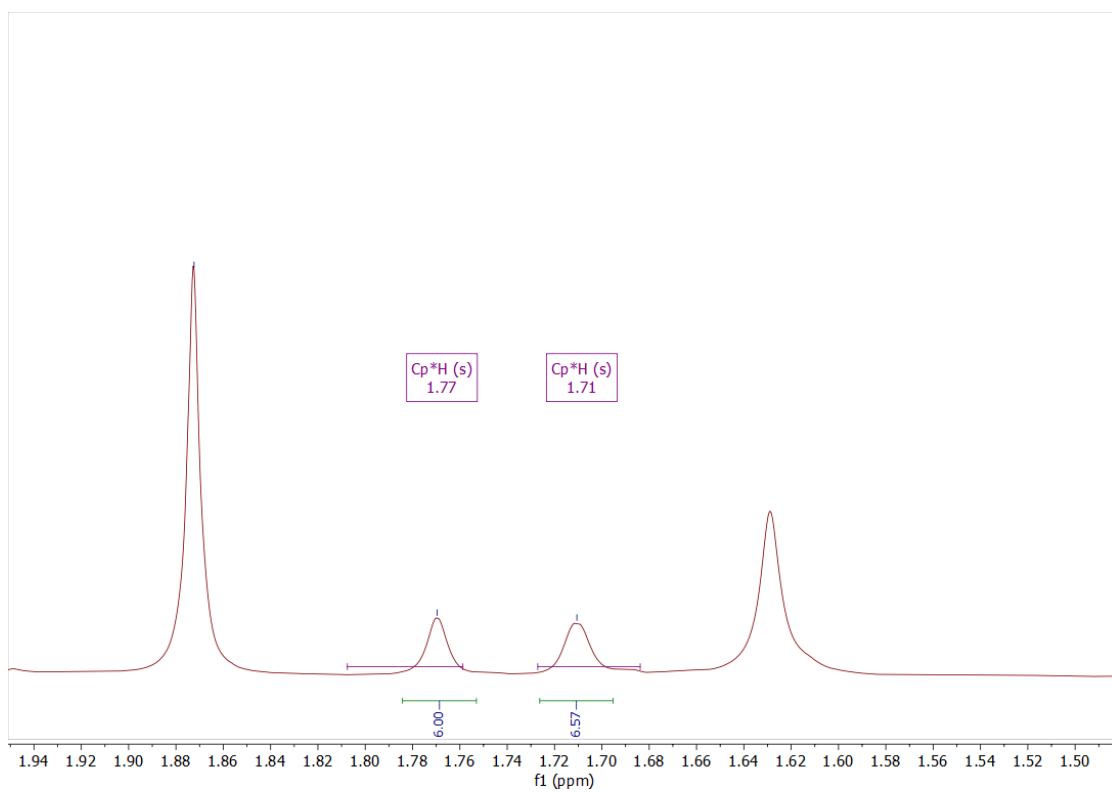

Figure S22: Excerpt of  $^1\text{H}$  NMR spectrum of the reaction of **1** with  $\text{H}_2$  under 1 h irradiation (350 nm). Showing peaks of free  $\text{Cp}^*\text{H}$  at 1.71 and 1.77 ppm.



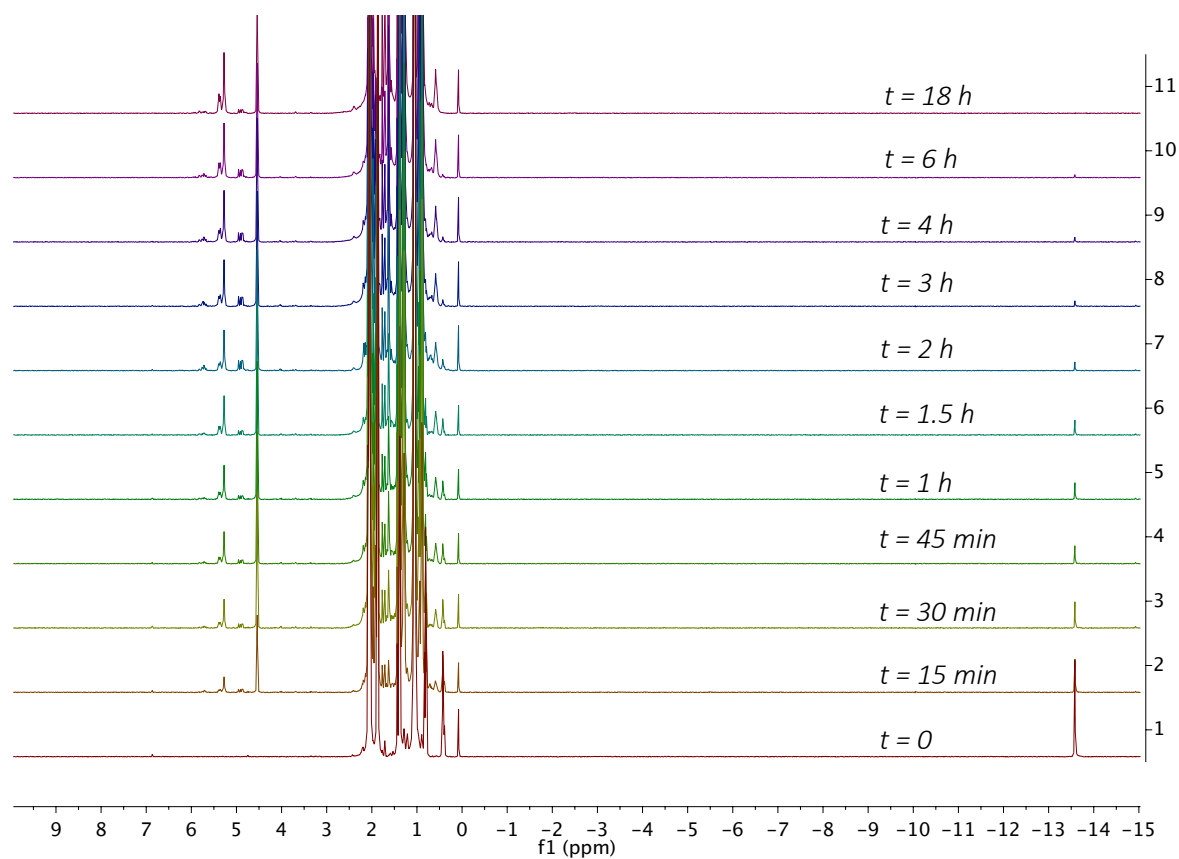

Figure S23: Full range stacked  $^1\text{H}$  NMR spectra of the conversion of 3-hexyne with **1** (5 mol%) under a dihydrogen atmosphere (2 bar) at 350 nm. Hydride shift of **1** at  $-13.6\text{ ppm}$ ; alkenes and hydrosilylation products between  $4.75$  and  $6.0\text{ ppm}$ .

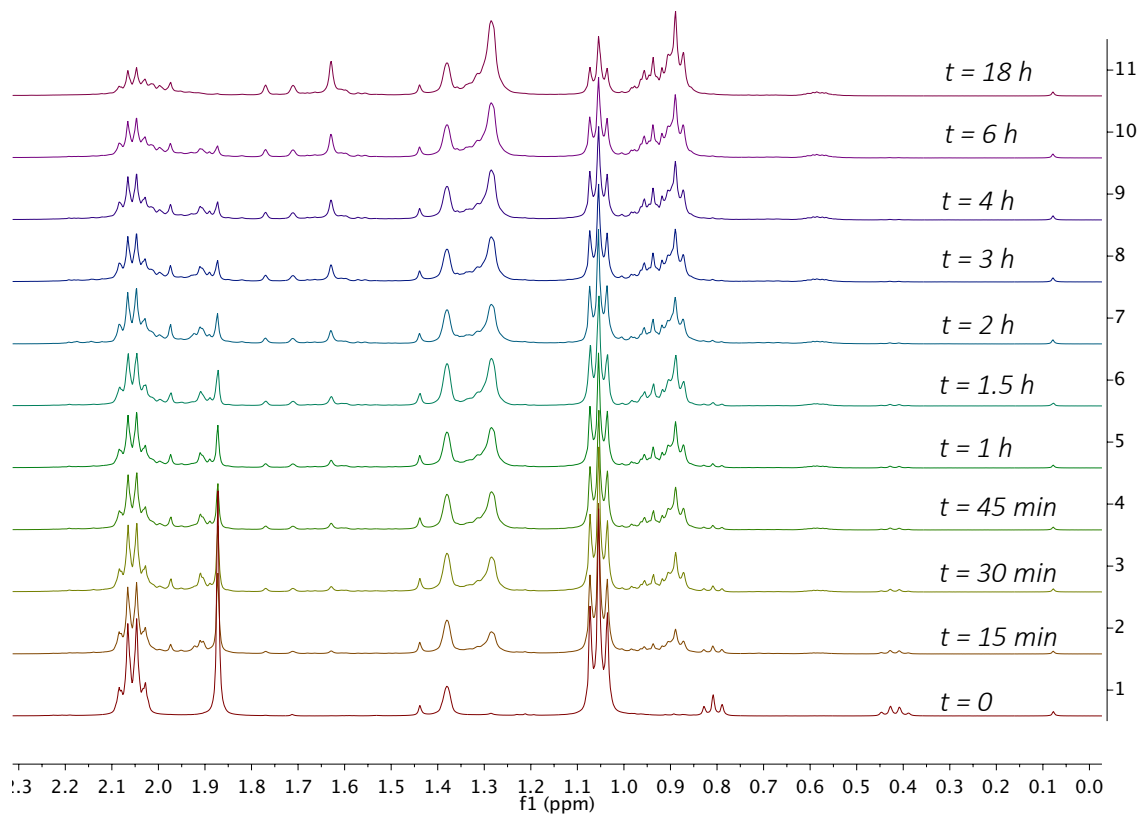

Figure S24: Zoomed in stacked  $^1\text{H}$  NMR spectra of the conversion of 3-hexyne with **1** (5 mol%) under a dihydrogen atmosphere (2 bar) at 350 nm. 3-Hexyne at 2.06 and 1.05 ppm; n-hexane ( $\text{CH}_2$ ) between 1.20 and 1.36 ppm;  $\text{CH}_3$  of n-hexane and hexenes between 0.85 and 1.01 ppm.

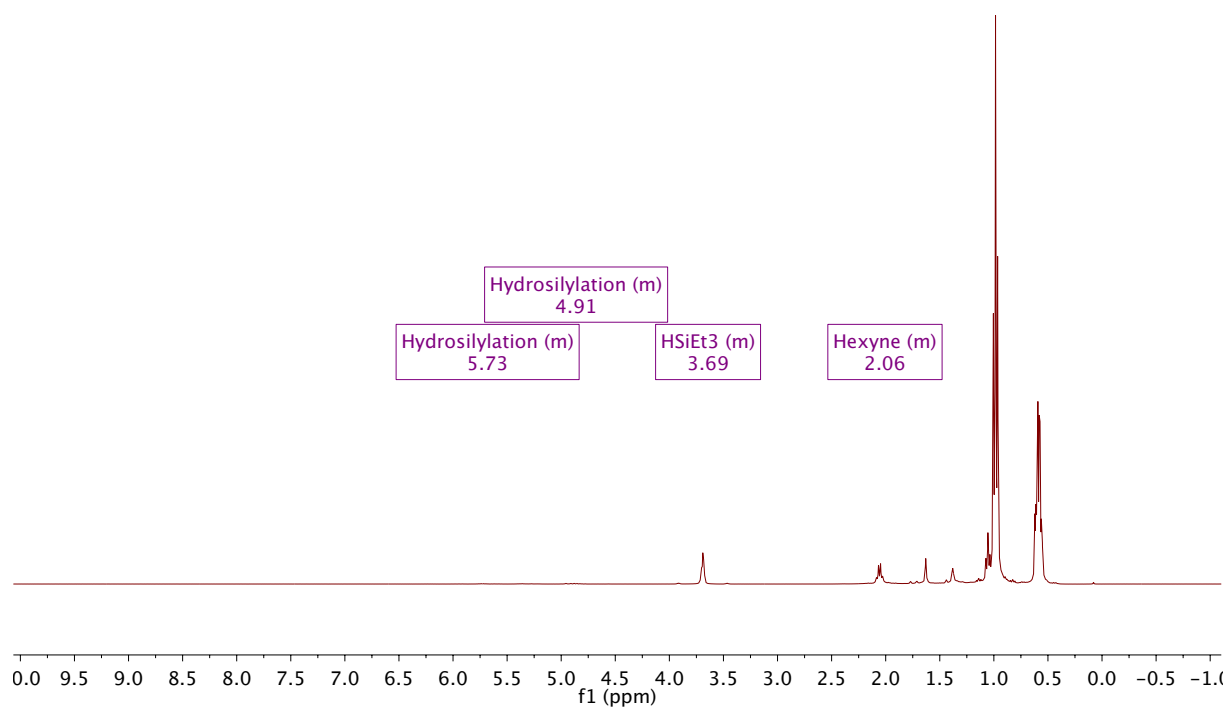

Figure S25: Full range  $^1\text{H}$  NMR spectrum of the conversion of 3-hexyne (1.0 eq.) and HSiEt<sub>3</sub> (5.0 eq.) with **1** (5 mol% against 3-hexyne) at 350 nm.

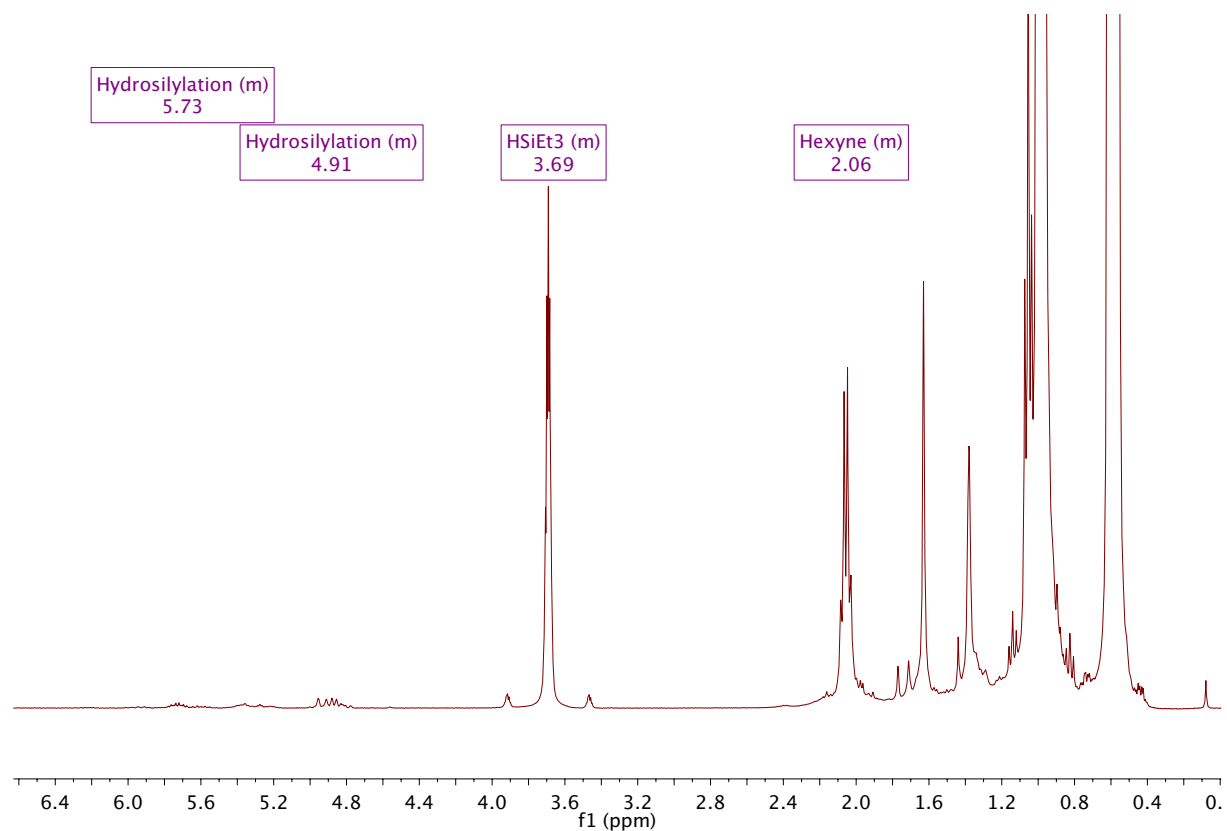

Figure S26: Zoomed in  $^1\text{H}$  NMR spectrum of the conversion of 3-hexyne (1.0 eq.) and HSiEt<sub>3</sub> (5.0 eq.) with **1** (5 mol% against 3-hexyne) at 350 nm.

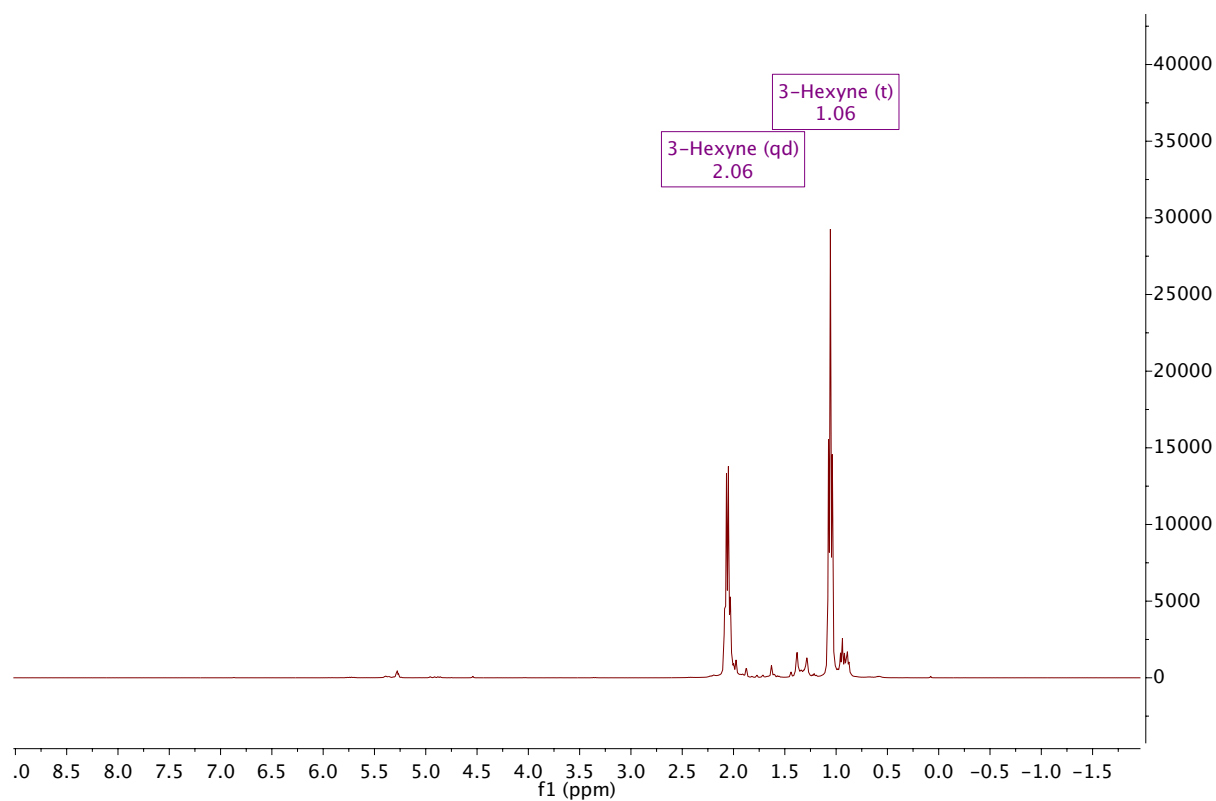

Figure S27: Full range  $^1\text{H}$  NMR spectra of the conversion of 3-hexyne with **1** (1 mol%) under a dihydrogen atmosphere (2 bar) after 24h at 350 nm.

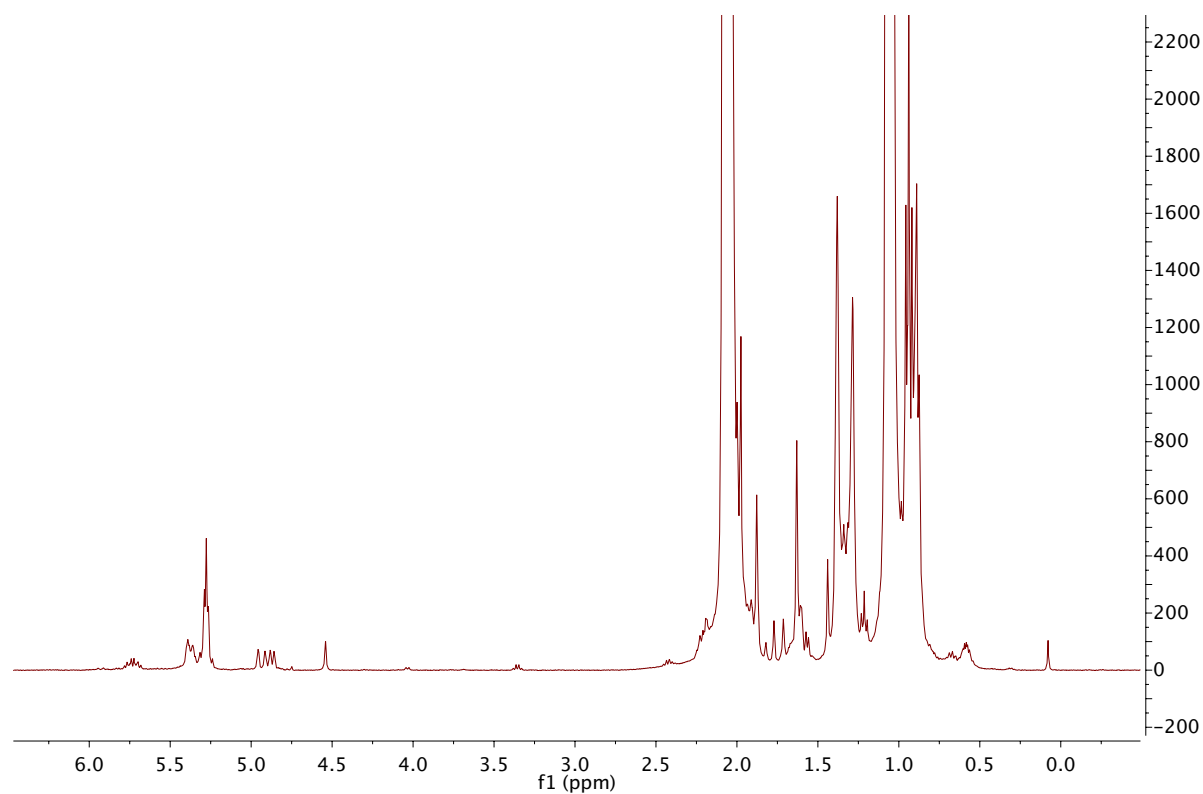

Figure S28: Zoomed in  $^1\text{H}$  NMR spectra of the conversion of 3-hexyne with **1** (1 mol%) under a dihydrogen atmosphere (2 bar) after 24h at 350 nm. Hexenes and hydrosilylation products between 4.75 and 6.0 ppm; n-hexane ( $\text{CH}_2$ ) between 1.20 and 1.36 ppm;  $\text{CH}_3$  of n-hexane and hexenes between 0.85 and 1.01 ppm.

## LIFDI mass spectra

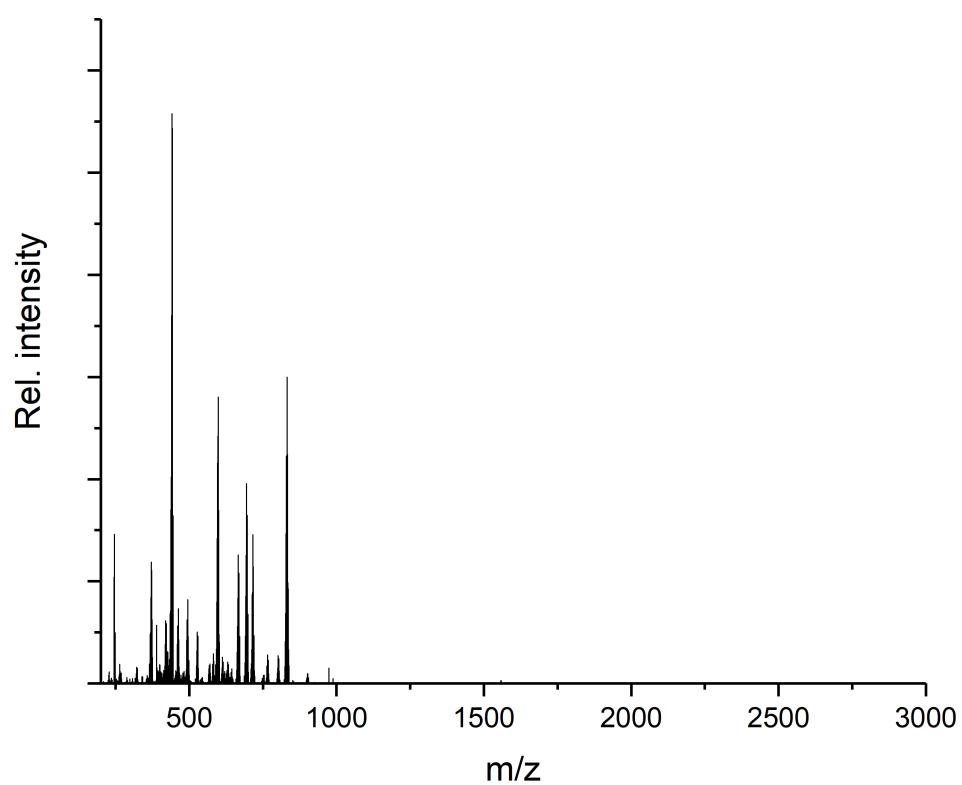

Figure S29: LIFDI mass spectrum of **1** after 8 h irradiation in cyclohexane. Main pattern corresponds to **1** ( $m/z = 832.13$ )  $[M-2H]^+$ .

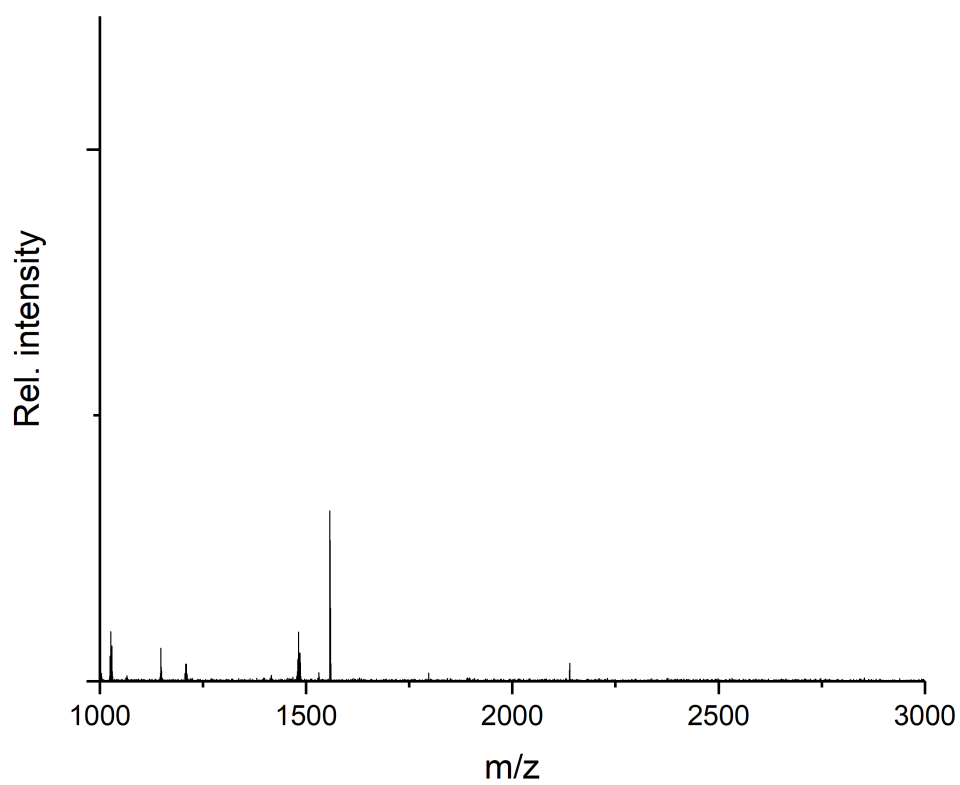

Figure S30: Excerpt of LIFDI mass spectrum of **1** after 8 h irradiation in cyclohexane. No peaks at higher masses – barely any cluster growth visible.

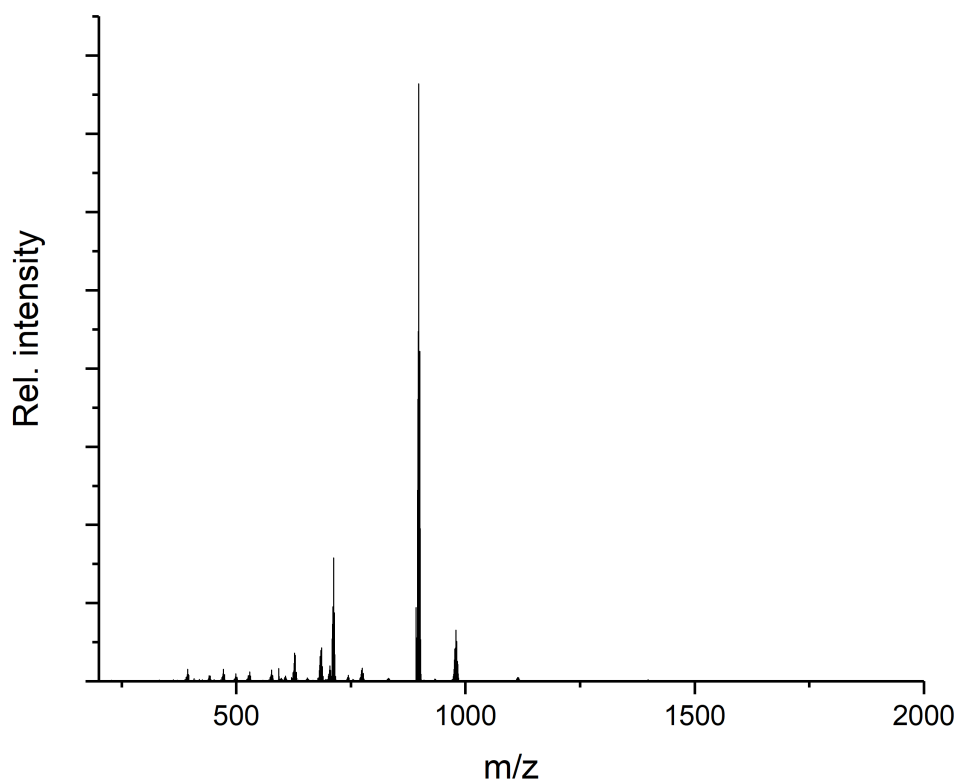

Figure S31: LIFDI mass spectrum of  $[(dppe)Ru(GaCp^*)_3]$  **4**.  $[M]^+$  ( $m/z = 1114.1656$ ; calc. 1114.1671);  $[M-Cp^*]^+$  ( $m/z = 979.0497$ ; calc. 979.0497);  $[M-2Cp^*-Ga]^+$  ( $m/z = 775.0068$ ; calc. 775.0080). Main peak at  $m/z = 898.1727$  attributed to  $[Ru(dppe)_2]$  (calc. 775.0080), formation assumed upon ionization.

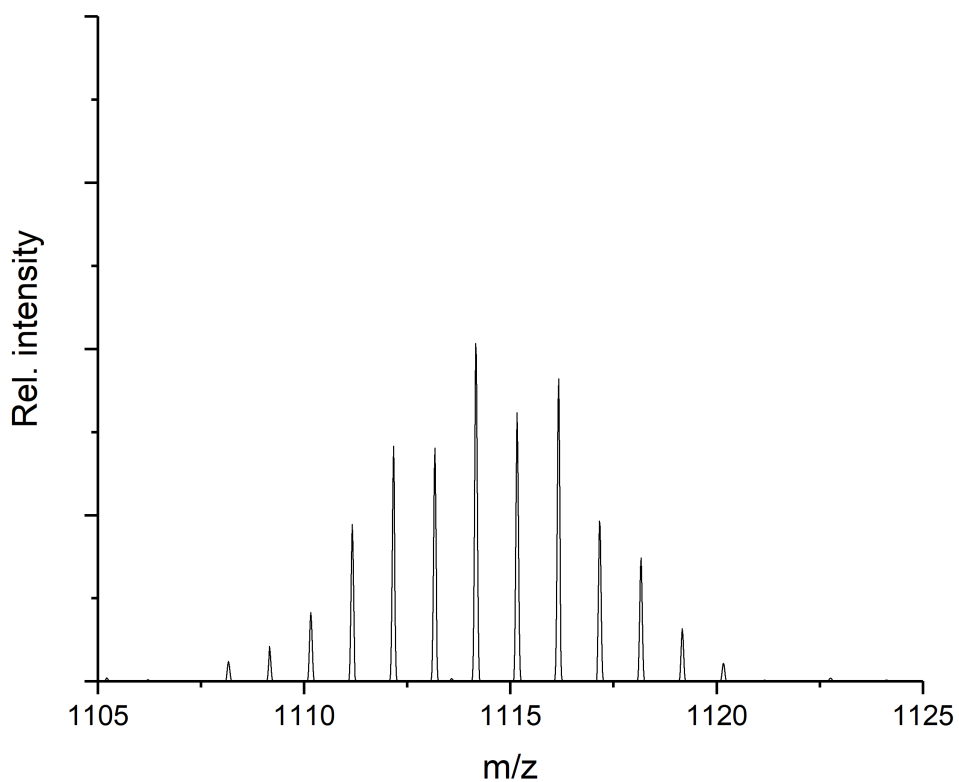

Figure S32: LIFDI mass spectrum of **4**. Excerpt of isotopic pattern of **4**.  $[M]^+$  ( $m/z = 1114.1656$ ; calc. 1114.1671).

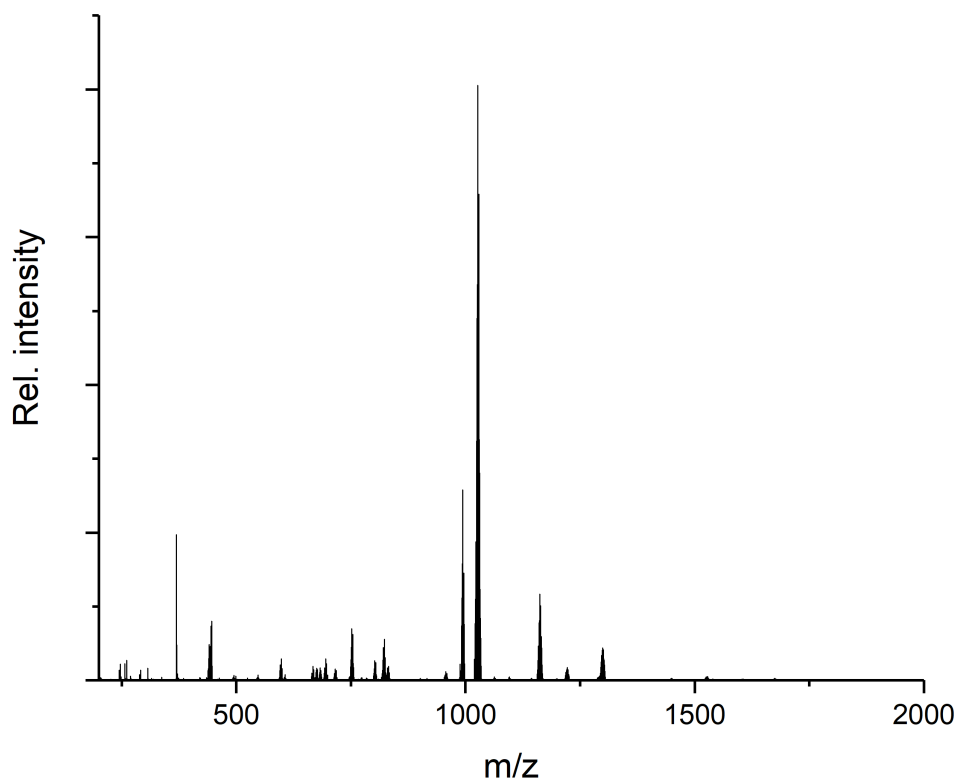

Figure S33: In situ LIFDI mass spectrum of the reaction **1** with 1 eq 1,2-bis(diphenylphosphino)benzene after 24 h irradiation (350 nm).

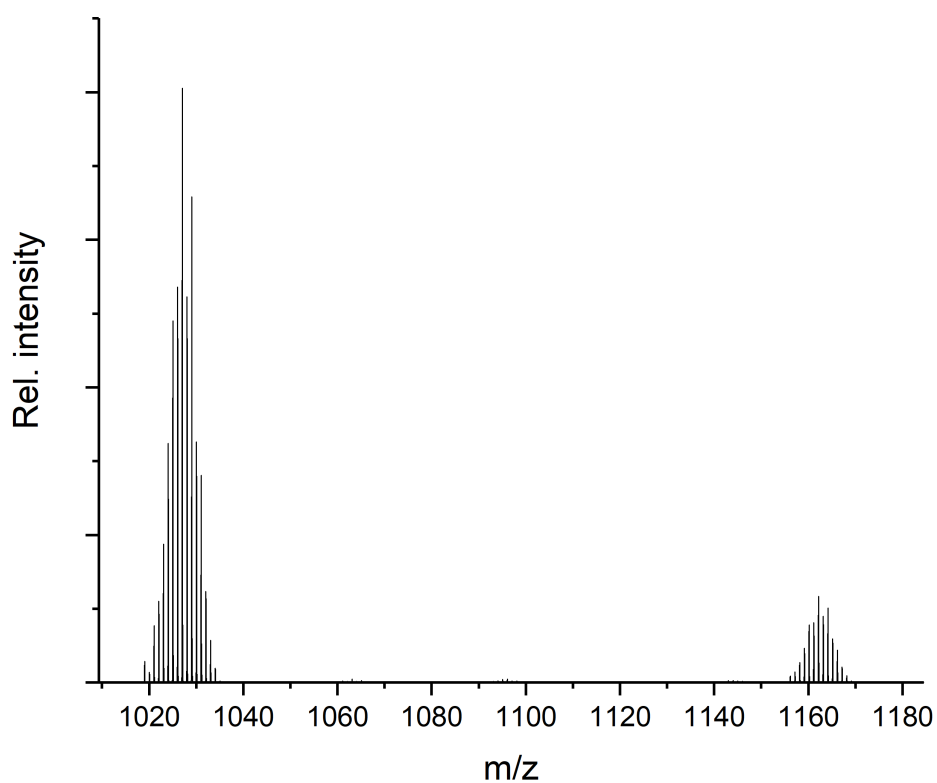

Figure S34: Excerpt of LIFDI mass spectrum of the reaction **1** with 1 eq 1,2-bis(diphenylphosphino)benzene (dppbz) after 24 h irradiation (350 nm). Peaks assigned to:  $m/z = 1162.18$   $[(dppbz)Ru(GaCp^*)_3]^+$  (calc. 1162.17);  $m/z = 1027.05$   $[M-Cp^*]^+$  (calc. 1027.05).

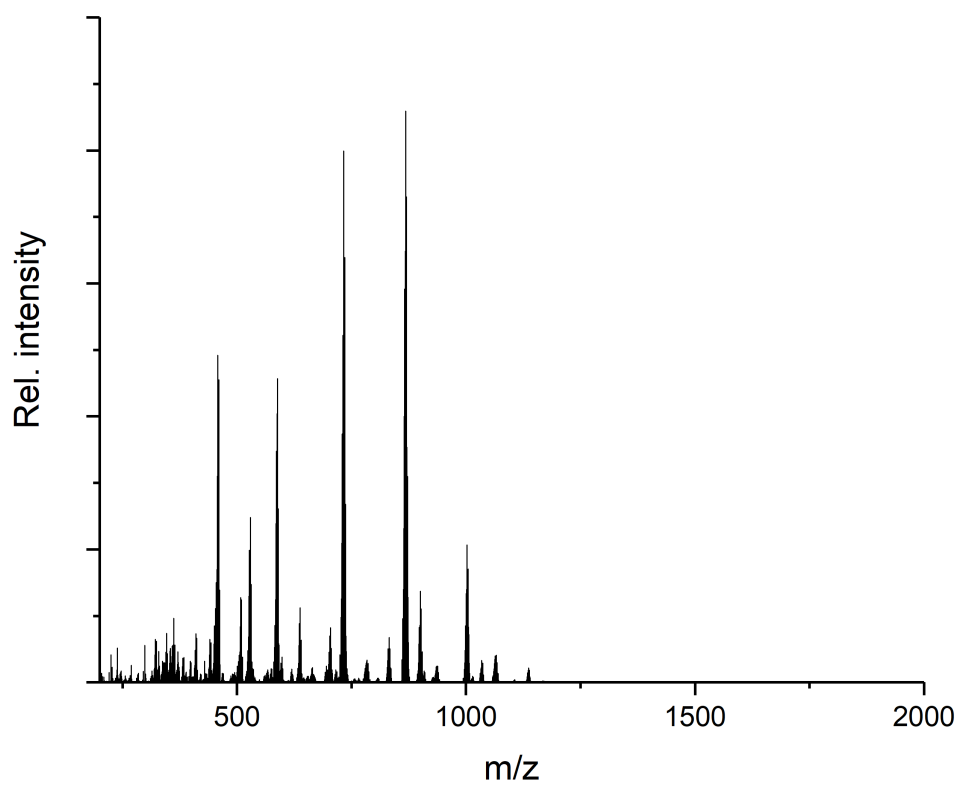

Figure S35: In situ LIFDI mass spectrum of the reaction 1 with 2 eq trimethyl phosphine after 24 h irradiation (350 nm).

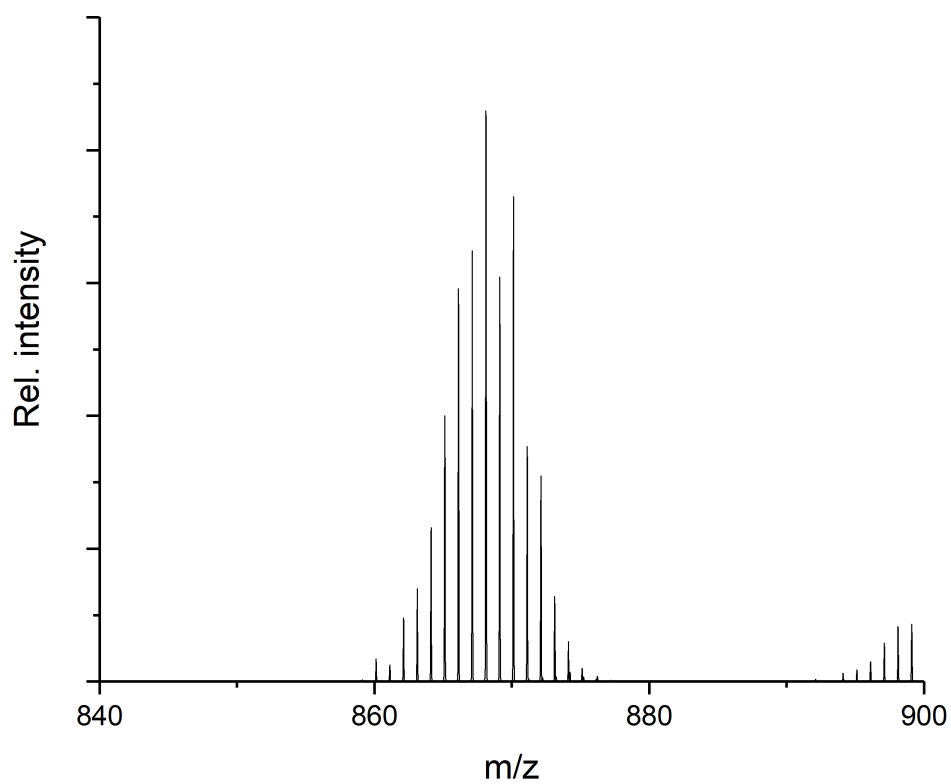

Figure S36: Excerpt of LIFDI mass spectrum of the reaction 1 with 2 eq trimethyl phosphine ( $\text{PMe}_3$ ) after 24 h irradiation (350 nm). Peak assigned to:  $m/z = 868.1195$  [ $(\text{Me}_3\text{P})_2\text{Ru}(\text{GaCp}^*)_3$ ] $^+$  (calc. 868.1202).



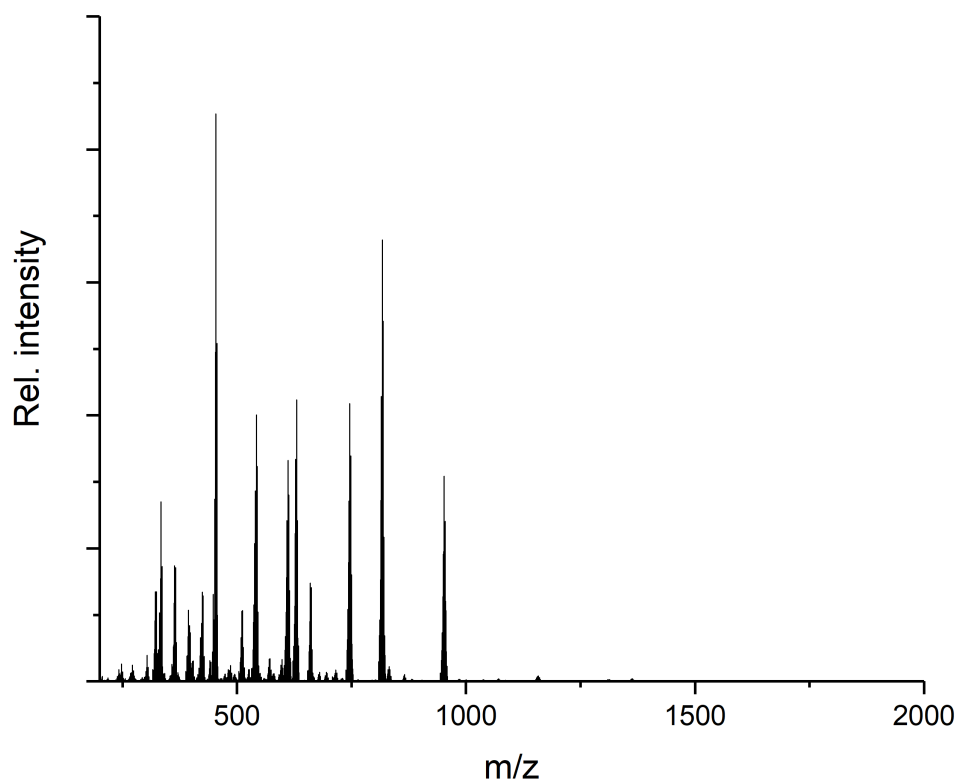

Figure S37: In situ LIFDI mass spectrum of the reaction 1 with 2 eq triethyl phosphine after 24 h irradiation (350 nm).

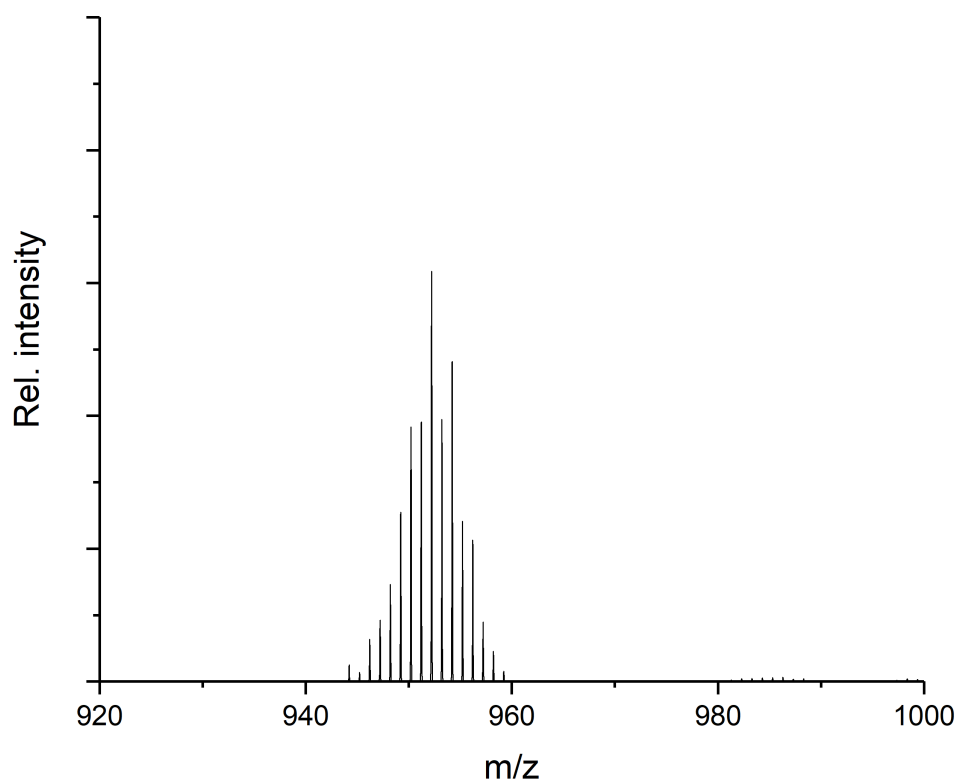

Figure S38: Excerpt of LIFDI mass spectrum of the reaction 1 with 2 eq triethyl phosphine ( $\text{PEt}_3$ ) after 24 h irradiation (350 nm). Peak assigned to:  $m/z = 952.2143$  [ $(\text{Et}_3\text{P})_2\text{Ru}(\text{GaCp}^*)_3$ ] $^+$  (calc. 952.2141).

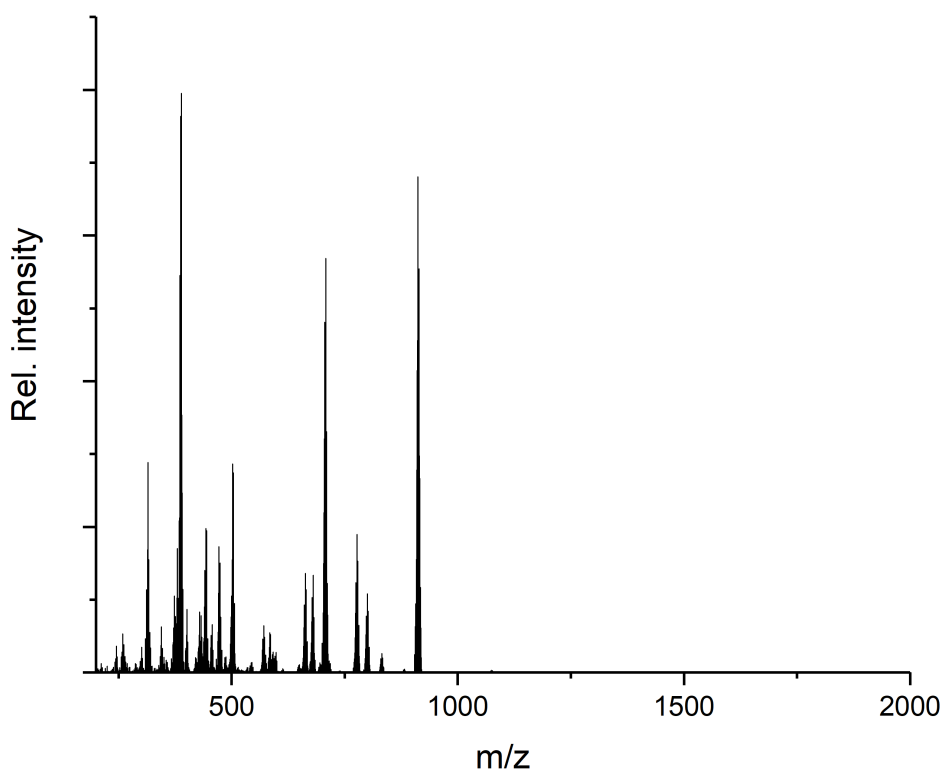

Figure S39: In-situ LIFDI mass spectrum of catalytic hydrogenation of 20 eq 3-hexyne under irradiation.

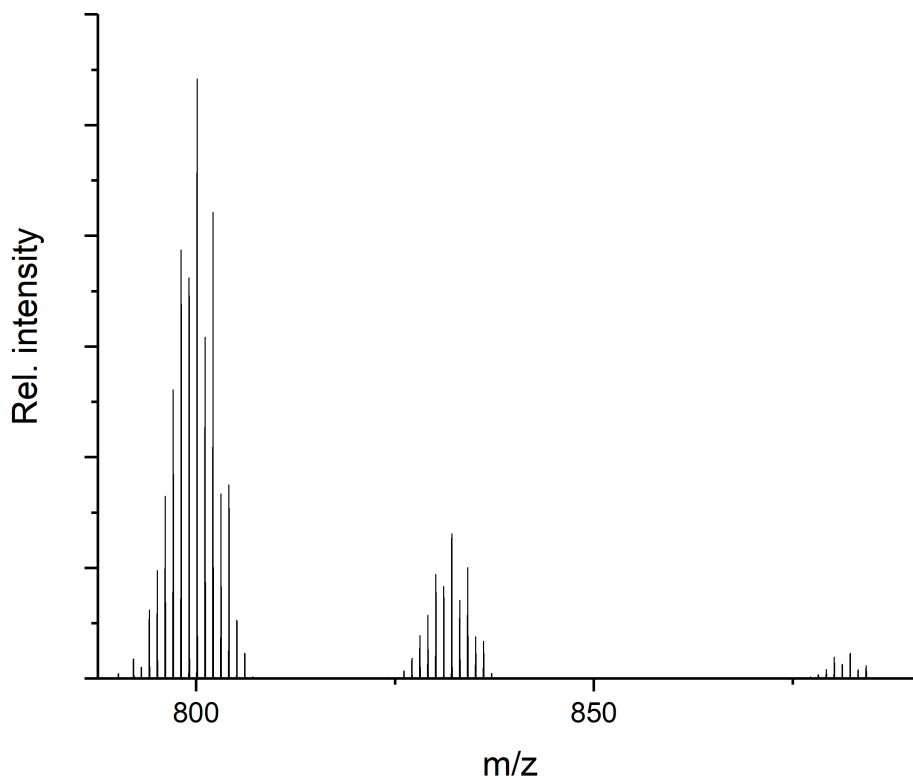

Figure S40: Excerpt of in-situ LIFDI mass spectrum of catalytic hydrogenation of 20 eq 3-hexyne under irradiation. Peak attributed to  $[Ru(GaCp^*)(hexene)]$  (**A**;  $m/z = 800.1251$ ; calc. 800.1257) significantly more intense than peak attributed to  $[Ru(GaCp^*)_3(hexyne)(hexene)]$  (**B**;  $m/z = 882.2044$ ; calc. 882.2039). Inverse to reaction with higher 3-hexyne concentration. Peak at  $m/z = 832$  results from unconverted **1**.

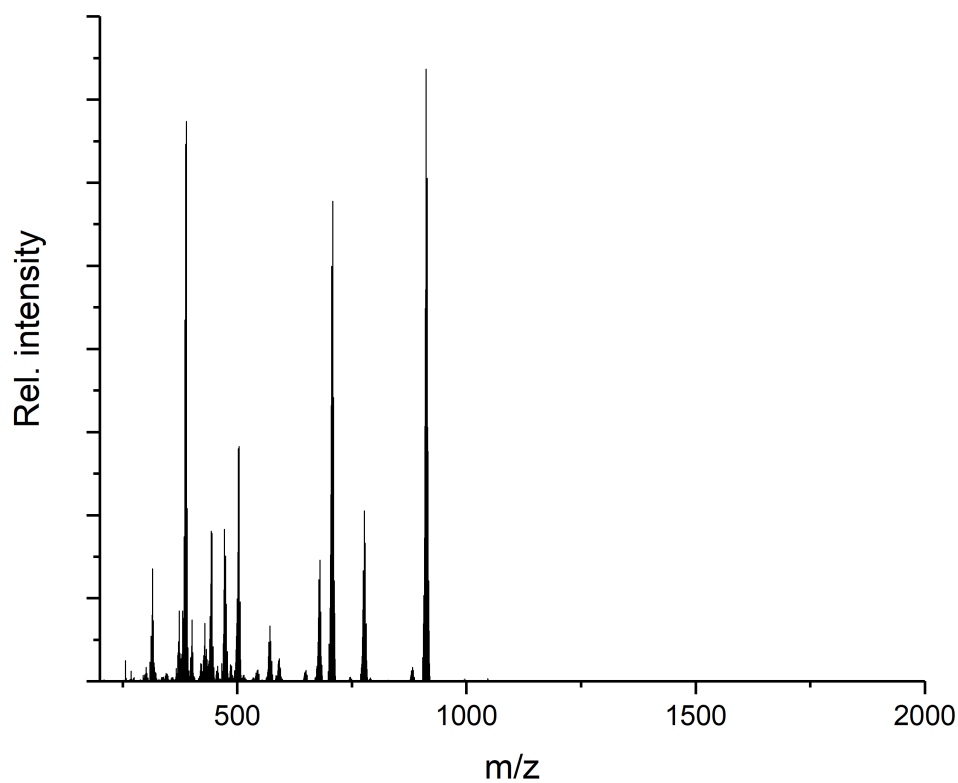

Figure S41: In-situ LIFDI mass spectrum of catalytic hydrogenation of 100 eq 3-hexyne under irradiation.

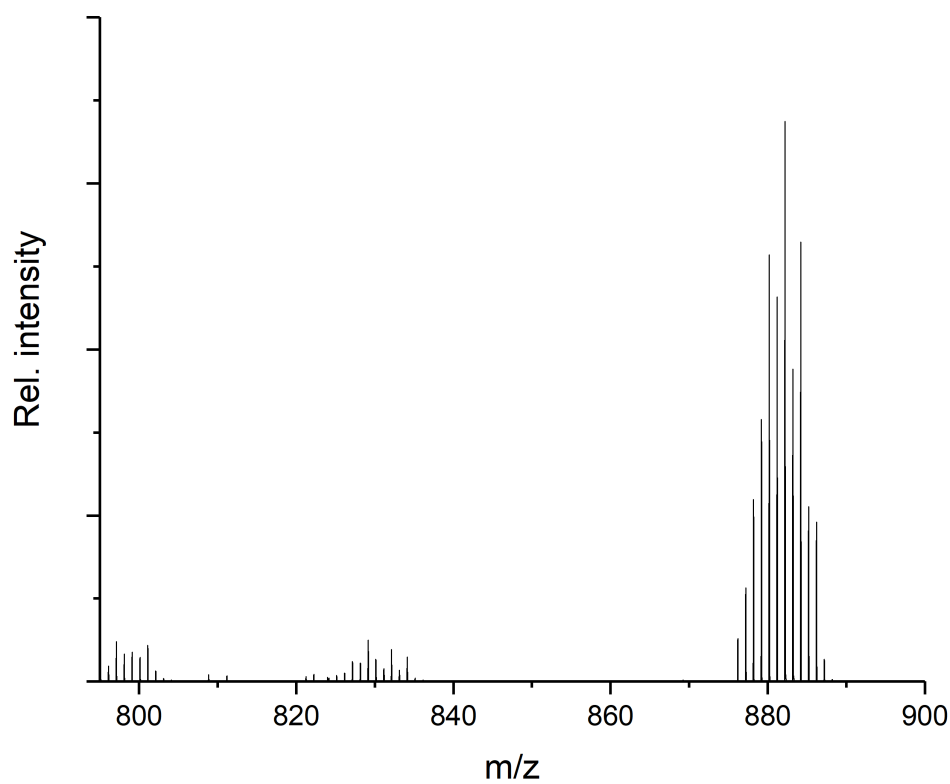

Figure S42: Excerpt of in-situ LIFDI mass spectrum of catalytic hydrogenation of 100 eq 3-hexyne under irradiation. Peak attributed to  $[\text{Ru}(\text{GaCp}^*)_3(\text{hexyne})(\text{hexene})]$  (**B**;  $m/z = 882.1997$ ; calc. 882.2039) significantly more intense than peak attributed to  $[\text{Ru}(\text{GaCp}^*)_3(\text{hexene})]$  (**A**<sub>2</sub>;  $m/z = 800.1180$ ; calc. 800.1257). Inverse to reaction with lower 3-hexyne concentration. Peak at  $m/z = 832$  results from unconverted **1**.

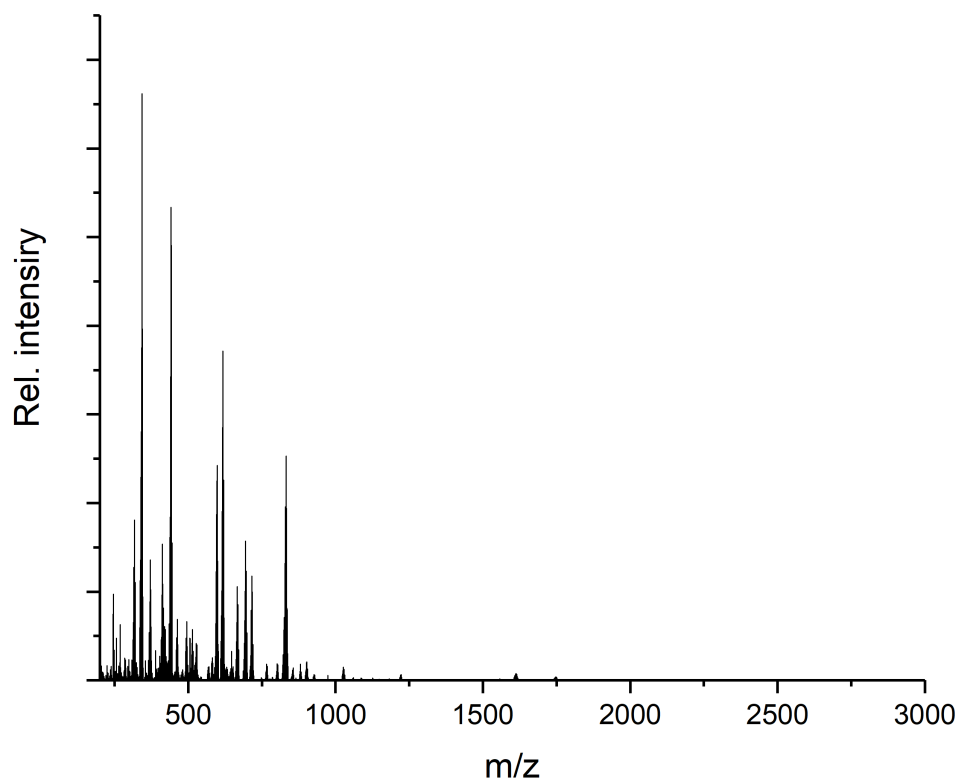

Figure S43: LIFDI mass spectrum of the reaction of **1** with  $H_2$  under 3 h irradiation (350 nm).

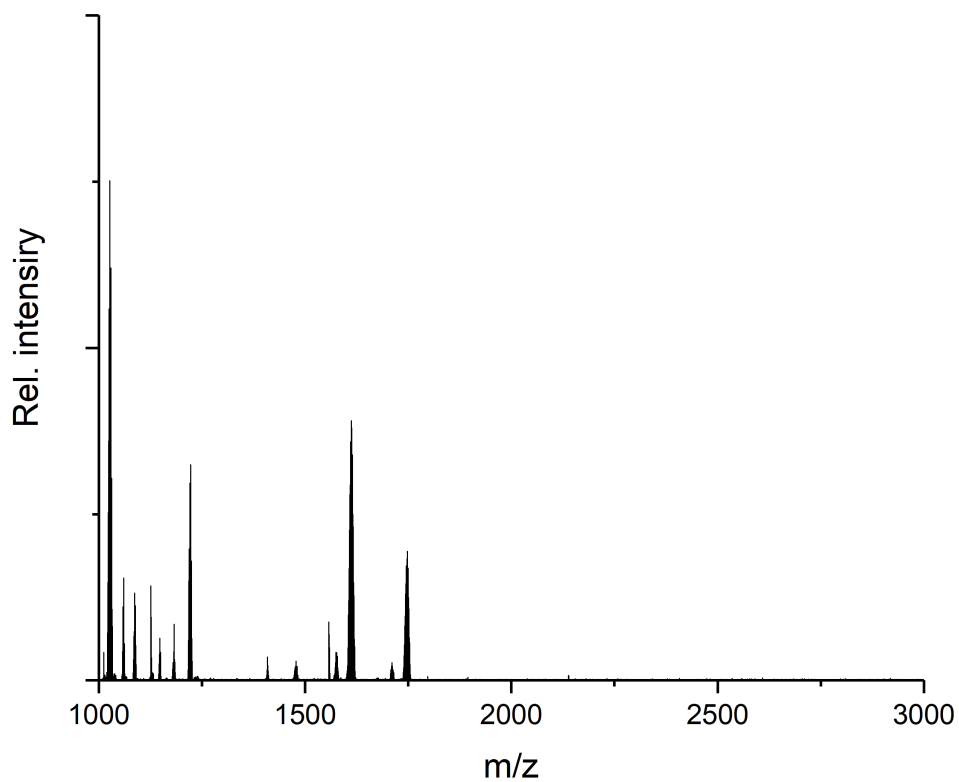

Figure S44: Excerpt of LIFDI mass spectrum of the reaction of **1** with  $H_2$  under 3 h irradiation (350 nm). Peaks assigned to composition as following:  $m/z = 1026.96$  ( $Ru_2Ga_4Cp^*_4H_5$ ),  $m/z = 1612.60$  ( $Ru_3Ga_9Cp^*_5H_5$ ),  $m/z = 1710.07$  ( $Ru_2Ga_8Cp^*_7H_3$ ) and  $m/z = 1747.73$  ( $Ru_3Ga_9Cp^*_6H_5$ ).

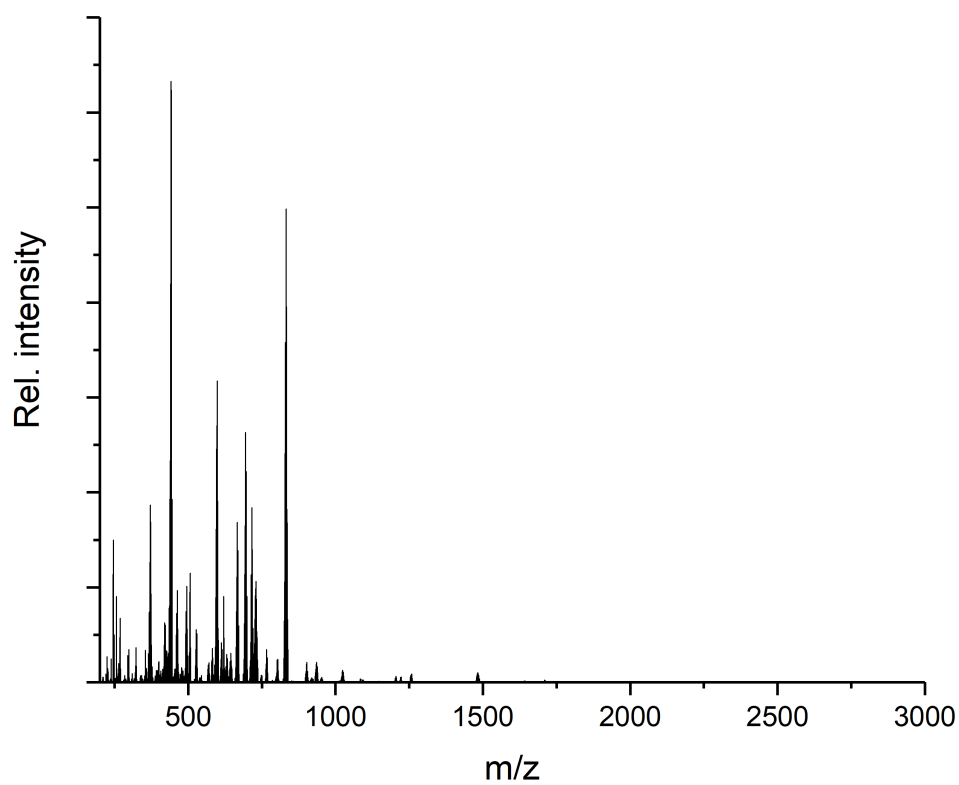

Figure S45: LIFDI mass spectrum after the catalytic conversion 3-hexyne with **1** and H<sub>2</sub> (2 bar) under 24 h irradiation (350 nm) in cyclohexane-d<sub>12</sub>.

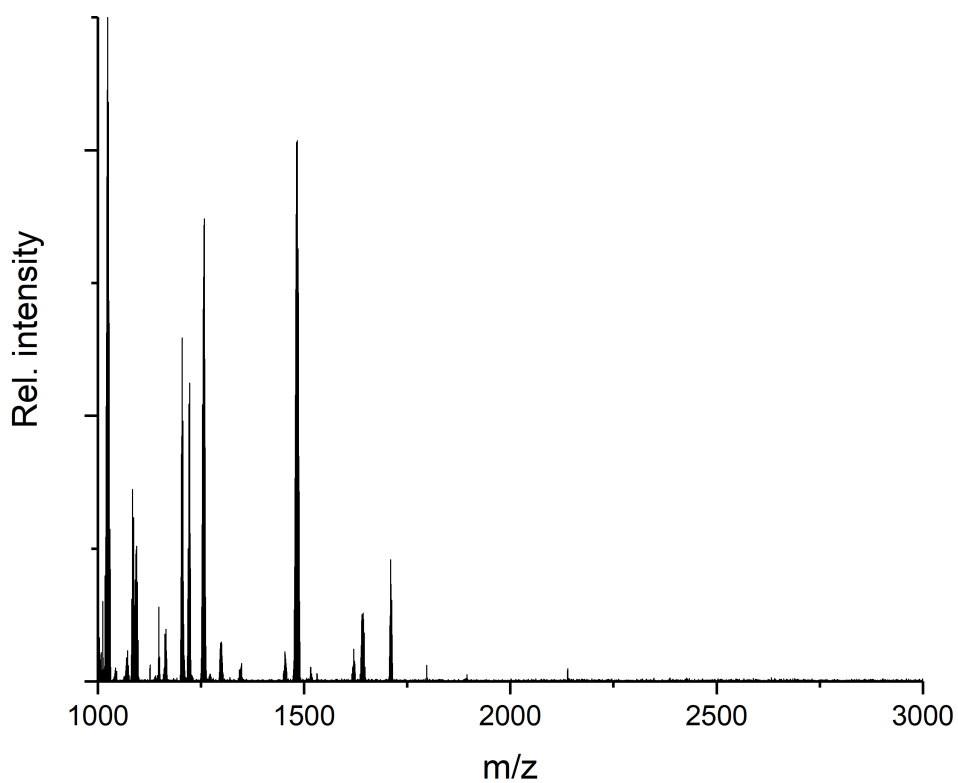

Figure S46: Excerpt of LIFDI mass spectrum after the catalysis. Several new clusters are formed:  $m/z = 1024.00$  ( $\text{Ru}_2\text{Ga}_4\text{Cp}^*_4\text{H}_2$ );  $m/z = 1093.92$  ( $\text{Ru}_2\text{Ga}_5\text{Cp}^*_4\text{H}$ );  $1481.96$  ( $\text{Ru}_2\text{Ga}_7\text{Cp}^*_5\text{SiEt}_3\text{H}$ );  $m/z = 1710.07$  ( $\text{Ru}_2\text{Ga}_8\text{Cp}^*_7\text{H}_3$ ).

## IR spectra

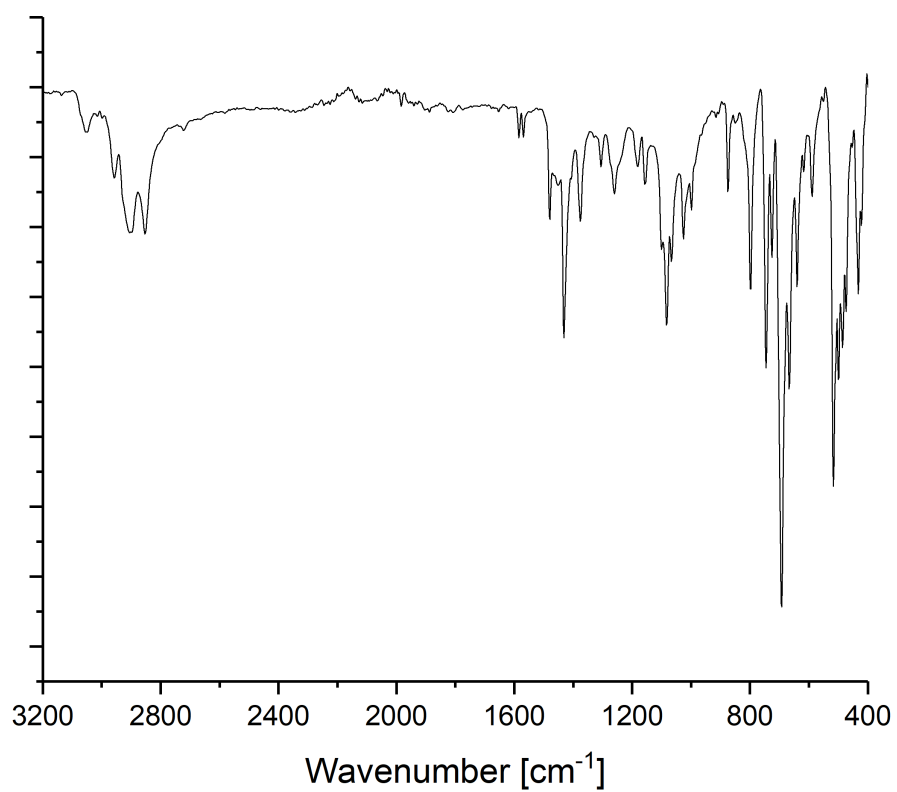

Figure S47: ATR-IR spectrum of  $[Ru(GaCp^*)(dppe)]$  (**4**). No typical Ru-H bands (range between 1600 and 2000  $cm^{-1}$ ).

## UV-Vis spectra

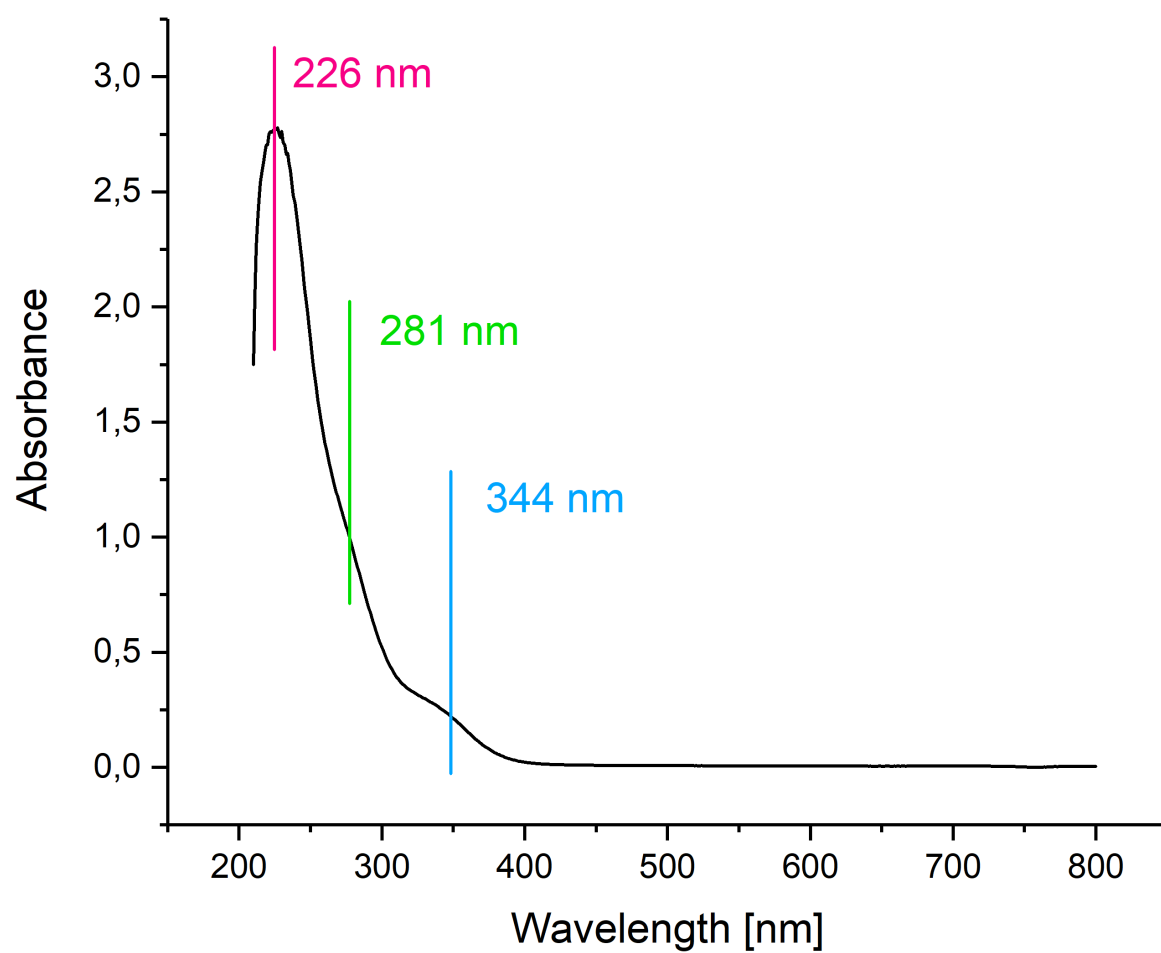

Figure S48: UV-Vis of **1** in cyclohexane. Reprinted with permission.<sup>[S1]</sup>
